# Supplementary material for: A luminescent organic radical with two pyridyl groups: high photostability and dual stimuli-responsive properties, with theoretical analyses of photophysical processes
Source: Royal Society of Chemistry journal article supplement (doi:10.1039/c7sc04034b), 2018-01-01
Supplement: c7sc04034b1.pdf [file c7sc04034b1.pdf]

## Supporting information

### **A Luminescent Organic Radical with Two Pyridyl Groups: High Photostability, Dual Stimuli-Responsive Property, and Theoretical Analyses of Photophysical Processes**

Shun Kimura, Akira Tanushi, Tetsuro Kusamoto, Shuntaro Kochi, Tohru Sato, Hiroshi Nishihara

#### **Contents**

|                                                                                                                                       |     |
|---------------------------------------------------------------------------------------------------------------------------------------|-----|
| Table S1 Selected angles in the crystal of bisPyTM                                                                                    | S2  |
| Table S2 Hyperfine coupling constants (hccs) used for ESR simulation and DFT-calculated values                                        | S3  |
| Table S3 Absolute photoluminescence quantum yield in various solvents                                                                 | S4  |
| Table S4 Crystallographic data of bisPyTM                                                                                             | S5  |
| Table S5 Absorption coefficients and emission maximum wavelengths of bisPyTM in various solvents                                      | S6  |
| Figure S1 Cyclic voltammogram of bisPyTM                                                                                              | S7  |
| Figure S2 Molecular orbitals of bisPyTM and PyBTM in $D_0$ and $D_1$ states calculated using DFT (UB3LYP/6-31G(d,p) 6D 10F) in vacuum | S8  |
| Figure S3 Relationship between photostability and solvent parameters                                                                  | S9  |
| Figure S4 Crystal structure of bisPyTM                                                                                                | S10 |
| Figure S5 Excitation spectrum and absorption spectrum of bisPyTM                                                                      | S11 |
| Figure S6 Absorption and emission spectra of bisPyTM in various solvents                                                              | S12 |
| Figure S7 Spectroscopic data of freshly prepared $\alpha H$ -bisPyTM                                                                  | S13 |
| Simulated bond lengths, bond angles, dihedral angles of bisPyTM and PyBTM by DFT calculations                                         | S14 |
| Cartesian coordinates of all the optimized geometries by DFT calculations                                                             | S24 |
| Abstracted results of TDDFT calculations                                                                                              | S32 |
| Fermi constant couplings by DFT calculation                                                                                           | S49 |
| Spin density by DFT calculation                                                                                                       | S50 |

Table S1. Selected angles in the crystal of bisPyTM

| <b>Angles</b>                            |                         |
|------------------------------------------|-------------------------|
| C4C1C9                                   | 118.80(17) <sup>o</sup> |
| C4C1C15                                  | 120.13(17) <sup>o</sup> |
| C9C1C15                                  | 121.05(19) <sup>o</sup> |
| Dihedral angle between C4C9C15 plain and |                         |
| (3,5-dichloropyridyl including N1)       | 54.58 <sup>o</sup>      |
| (3,5-dichloropyridyl including N2)       | 40.07 <sup>o</sup>      |
| (2,4,6-trichlorophenyl)                  | 50.07 <sup>o</sup>      |

Table S2. Hyperfine coupling constants (hccs) used for ESR simulation and DFT-calculated values

| <b>hcc / mT</b> | <b>N</b> | <b>H</b> |
|-----------------|----------|----------|
| Sim.            | 0.108    | 0.108    |
| Calcd.          | 0.1174   | 0.1341   |
|                 | 0.1174   | 0.1515   |
|                 |          | 0.1412   |

Table S3. Absolute photoluminescence quantum yield in various solvents

| Solvent         | $\phi$ (bisPyTM) |
|-----------------|------------------|
| chloroform      | 1.2 %            |
| dichloromethane | 1.1 %            |
| hexane          | 0.9 %            |
| cyclohexane     | 0.9 %            |
| acetonitrile    | 0.7 %            |
| ethylacetate    | 0.7 %            |
| acetone         | 0.5 %            |
| diethyl ether   | 0.5 %            |
| ethanol         | 0.4 %            |
| methanol        | 0.4 %            |
| tetrahydrofuran | 0.3 %            |
| toluene         | 0.2 %            |

Table S4. Crystallographic data of bisPyTM

|                                                |                                                               |
|------------------------------------------------|---------------------------------------------------------------|
| Empirical formula                              | C <sub>17</sub> H <sub>6</sub> Cl <sub>7</sub> N <sub>2</sub> |
| <i>F<sub>w</sub></i> / g mol <sup>-1</sup>     | 486.42                                                        |
| Crystal system                                 | monoclinic                                                    |
| Space group                                    | <i>P</i> 2 <sub>1</sub> / <i>n</i>                            |
| Crystal size / mm                              | 0.20×0.18×0.03                                                |
| Temperature / K                                | 113                                                           |
| <i>a</i> / Å                                   | 8.7015(13)                                                    |
| <i>b</i> / Å                                   | 14.840(3)                                                     |
| <i>c</i> / Å                                   | 14.860(3)                                                     |
| <i>α</i> / °                                   | 90                                                            |
| <i>β</i> / °                                   | 105.5165(15)                                                  |
| <i>γ</i> / °                                   | 90                                                            |
| <i>V</i> / Å <sup>3</sup>                      | 1848.9(5)                                                     |
| <i>r</i> <sub>calcd</sub> / g cm <sup>-3</sup> | 1.747                                                         |
| <i>l</i> / Å                                   | 0.7107                                                        |
| <i>μ</i> / mm <sup>-1</sup>                    | 1.077                                                         |
| Reflections collected                          | 14405                                                         |
| Independent reflections                        | 4208                                                          |
| Parameters                                     | 235                                                           |
| <i>R</i> <sub>int</sub>                        | 0.0226                                                        |
| <i>R</i> 1 <sup>a</sup>                        | 0.0344                                                        |
| <i>wR</i> 2 <sup>b</sup>                       | 0.0888                                                        |
| GoF <sup>c</sup>                               | 1.062                                                         |

<sup>a</sup>*R*<sub>1</sub> =  $\sum ||F^o| - |F^c|| / \sum |F^o|$  (*l* > 2σ(*l*)). <sup>b</sup>*wR*<sub>2</sub> =  $[\sum (w(F^{o2} - F^{c2})^2) / \sum w(F^{o2})^2]^{1/2}$  (*l* > 2σ(*l*)).

<sup>c</sup>GoF =  $[\sum (w(F^{o2} - F^{c2})^2) / \sum (N^r - N^p)^2]$ .

Table S5 Absorption coefficients (at 355 nm) and emission maximum wavelengths of bisPyTM in various solvents

| Solvents        | $\epsilon / 10^4 \text{M}^{-1} \text{cm}^{-1}$ | $\lambda_{\text{em}} / \text{nm}$ |
|-----------------|------------------------------------------------|-----------------------------------|
| chloroform      | 1.65                                           | 658                               |
| dichloromethane | 1.78                                           | 650                               |
| hexane          | 1.85                                           | 652                               |
| cyclohexane     | 1.46                                           | 653                               |
| acetonitrile    | 2.19                                           | 673                               |
| ethylacetate    | 1.41                                           | 674                               |
| acetone         | 1.36                                           | 676                               |
| diethyl ether   | 1.76                                           | 659                               |
| ethanol         | 1.48                                           | 669                               |
| methanol        | 1.23                                           | 673                               |
| tetrahydrofuran | 1.37                                           | 657                               |
| toluene         | 1.58                                           | 666                               |

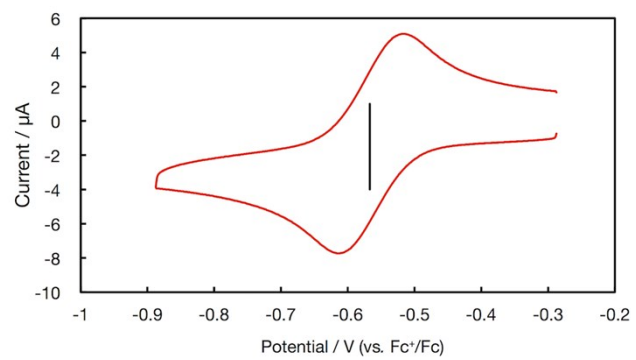

Figure S1. Cyclic voltammogram of bisPyTM.

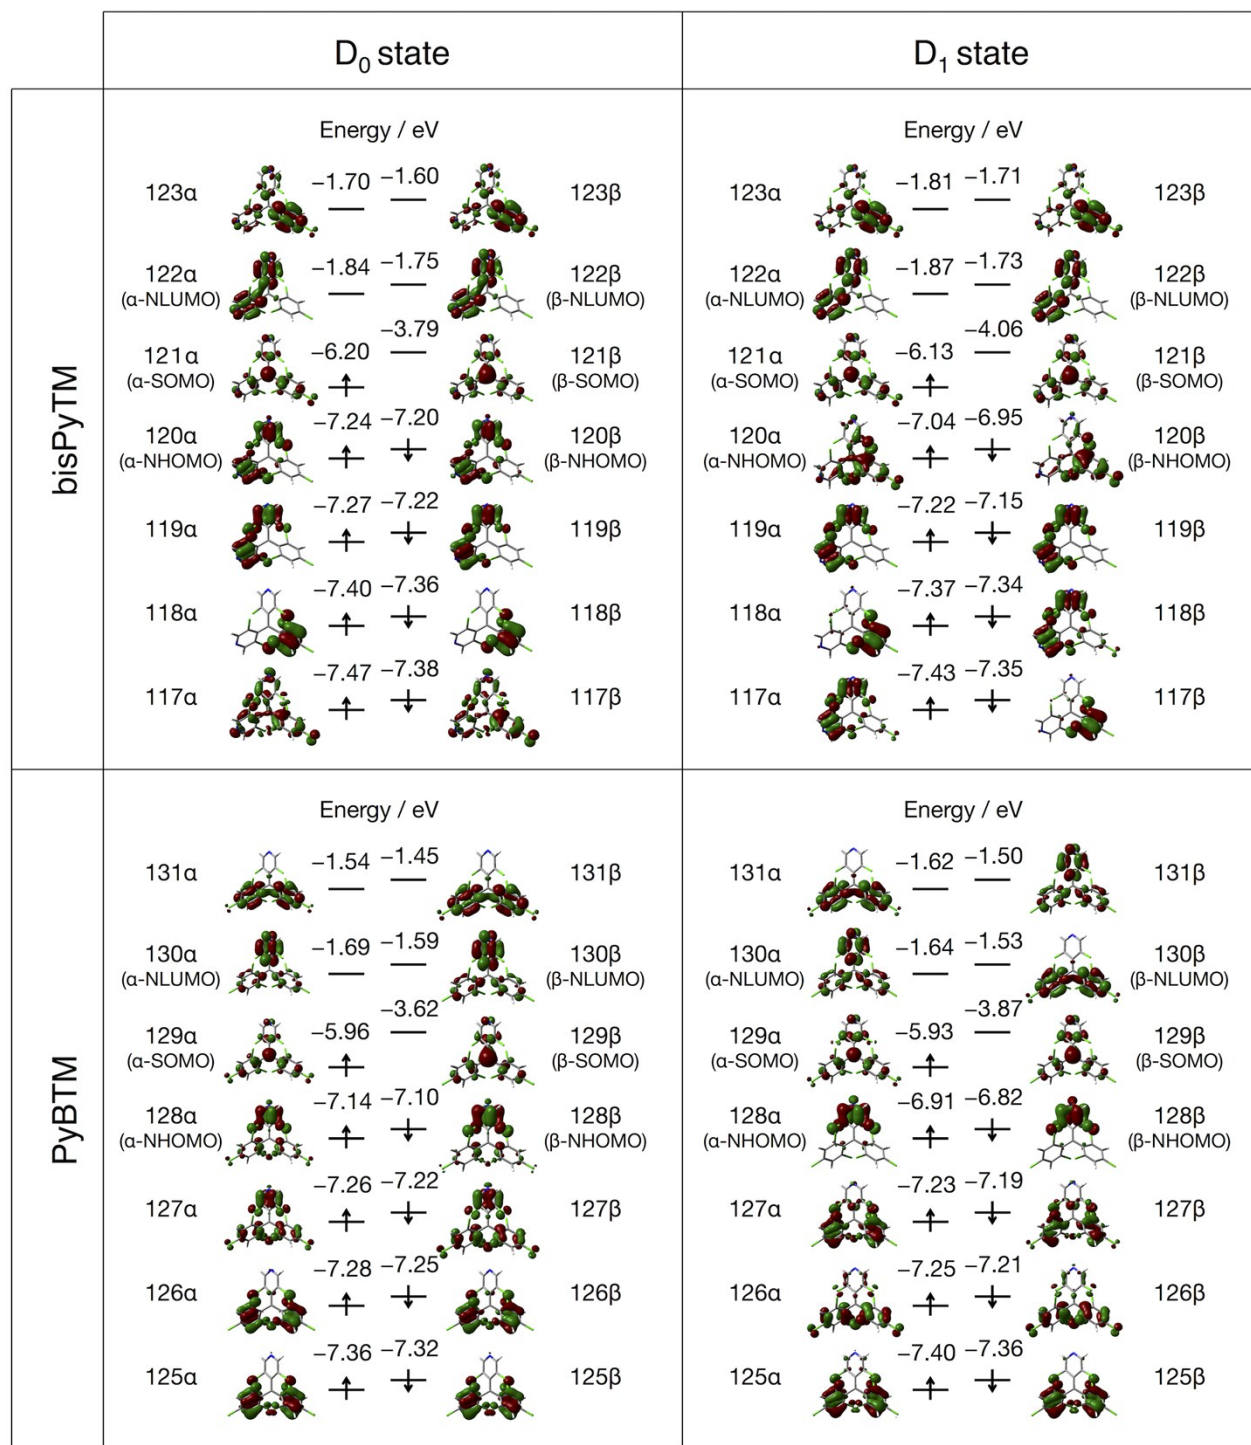

Figure S2. Molecular orbitals of bisPyTM and PyBTM in  $D_0$  and  $D_1$  states calculated using DFT (UB3LYP/6-31G(d,p) 6D 10F) in vacuum.



### PyBTM

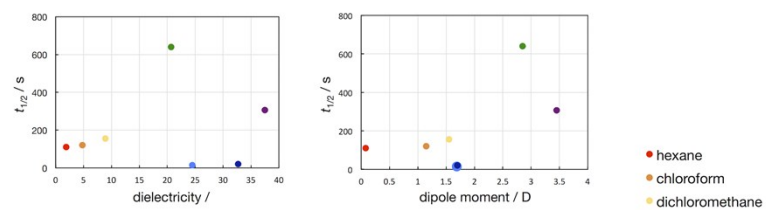

### bisPyTM

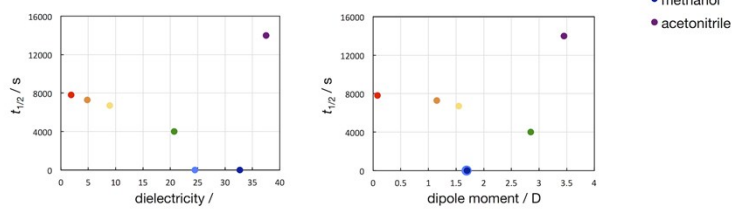

Figure S3. Relationship between photostability and solvent parameters.

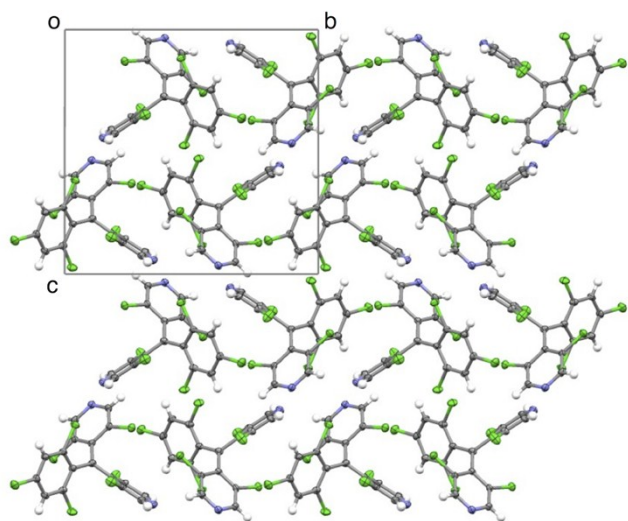

Figure S4. Crystal structure viewed along  $a$ -axis of bisPyTM with thermal ellipsoids set at 50% probability.

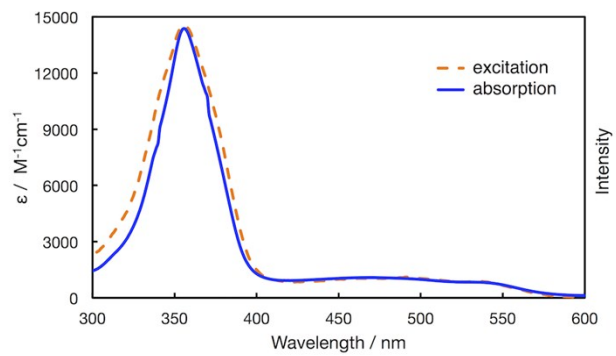

Figure S5. Excitation spectrum for emission wavelength at 650 nm and absorption spectrum of bisPyTM.

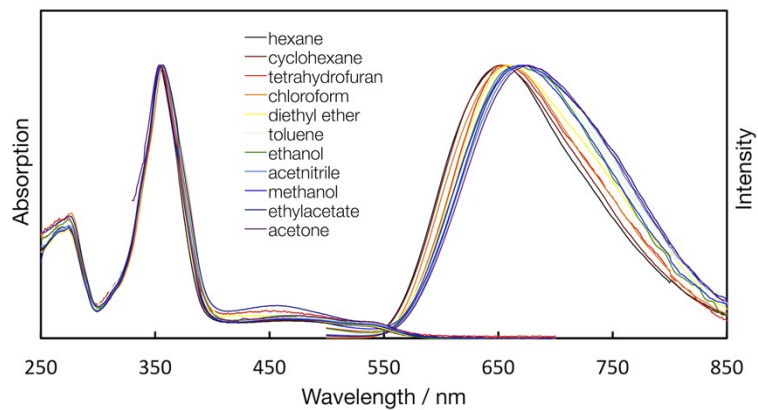

Figure S6. Absorption and emission spectra of bisPyTM in various solvents.

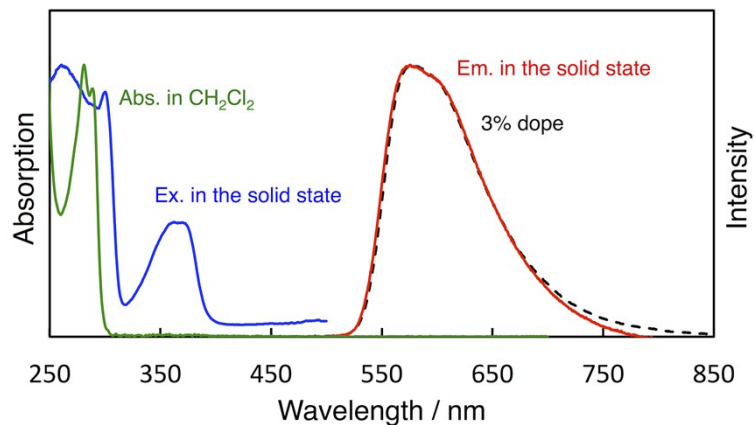

Figure S7. Emission (red) and excitation (blue) spectra of freshly prepared  $\alpha H$ -bisPyTM crystals, and an absorption spectrum of freshly prepared  $\alpha H$ -bisPyTM in dichloromethane. Black dashed line indicates the emission spectra of  $\alpha H$ -bisPyTM crystals doped with 3 wt % of bisPyTM. We found that it was very difficult to prepare perfectly non-doped  $\alpha H$ -bisPyTM crystals (= 0% doped crystal), because tiny amount of bisPyTM (< 0.2 wt %) was always contaminated in  $\alpha H$ -bisPyTM. The freshly prepared  $\alpha H$ -bisPyTM crystals displayed bisPyTM-based emission while no emission from  $\alpha H$ -bisPyTM was observed.

## Simulated bond lengths, bond angles, dihedral angles of bisPyTM and PyBTM by DFT calculations

The numbers representing the atoms of bisPyTM (left) and PyBTM(right) in DFT calculations.

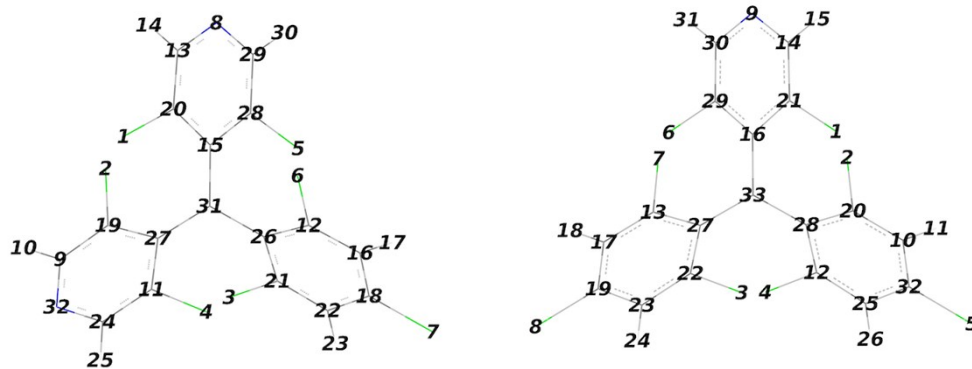

### Bond lengths of bisPyTM

| atoms | D <sub>0</sub> state | D <sub>1</sub> state |
|-------|----------------------|----------------------|
| 1,20  | 1.7514               | 1.7571               |
| 2,19  | 1.7514               | 1.7572               |
| 3,21  | 1.7539               | 1.7351               |
| 4,11  | 1.7513               | 1.7555               |
| 5,28  | 1.7513               | 1.7554               |
| 6,12  | 1.7539               | 1.7351               |
| 7,18  | 1.7488               | 1.7289               |
| 8,13  | 1.3347               | 1.3399               |
| 8,29  | 1.3346               | 1.3361               |
| 9,10  | 1.0861               | 1.0866               |
| 9,19  | 1.3936               | 1.3898               |
| 9,32  | 1.3347               | 1.3399               |
| 11,24 | 1.3939               | 1.3899               |
| 11,27 | 1.4156               | 1.4254               |
| 12,16 | 1.3903               | 1.3787               |
| 12,26 | 1.4188               | 1.4551               |
| 13,14 | 1.0861               | 1.0866               |
| 13,20 | 1.3936               | 1.3898               |
| 15,20 | 1.4155               | 1.4262               |
| 15,28 | 1.4156               | 1.4254               |

|       |        |        |
|-------|--------|--------|
| 15,31 | 1.4751 | 1.4458 |
| 16,17 | 1.0822 | 1.0824 |
| 16,18 | 1.3913 | 1.4041 |
| 18,22 | 1.3913 | 1.4041 |
| 19,27 | 1.4155 | 1.4263 |
| 21,22 | 1.3903 | 1.3788 |
| 21,26 | 1.4188 | 1.4552 |
| 22,23 | 1.0822 | 1.0824 |
| 24,25 | 1.0861 | 1.0864 |
| 24,32 | 1.3346 | 1.3361 |
| 26,31 | 1.4735 | 1.4711 |
| 27,31 | 1.4751 | 1.4457 |
| 28,29 | 1.3939 | 1.3898 |
| 29,30 | 1.0861 | 1.0864 |

#### Bond angles of bisPyTM

-----

| atoms    | D <sub>0</sub> state | D <sub>1</sub> state |
|----------|----------------------|----------------------|
| 13,8,29  | 117.5422             | 116.5374             |
| 10,9,19  | 119.5589             | 119.0583             |
| 10,9,32  | 117.414              | 116.9434             |
| 19,9,32  | 123.0237             | 123.9718             |
| 4,11,24  | 116.5756             | 117.1808             |
| 4,11,27  | 122.065              | 119.3982             |
| 24,11,27 | 121.2746             | 123.3693             |
| 6,12,16  | 115.8007             | 117.5346             |
| 6,12,26  | 120.9253             | 119.1123             |
| 16,12,26 | 123.1749             | 123.3415             |
| 8,13,14  | 117.414              | 116.9446             |
| 8,13,20  | 123.0237             | 123.9699             |
| 14,13,20 | 119.5589             | 119.059              |
| 20,15,28 | 113.7557             | 111.3281             |
| 20,15,31 | 123.1485             | 125.3255             |
| 28,15,31 | 123.0957             | 123.2739             |
| 12,16,17 | 120.2483             | 120.5069             |
| 12,16,18 | 118.8017             | 119.0545             |
| 17,16,18 | 120.9385             | 120.4003             |
| 7,18,16  | 119.4406             | 119.3073             |

|          |          |          |
|----------|----------|----------|
| 7,18,22  | 119.4406 | 119.3149 |
| 16,18,22 | 121.1189 | 121.3779 |
| 2,19,9   | 116.6502 | 116.1935 |
| 2,19,27  | 121.9322 | 121.5757 |
| 9,19,27  | 121.3319 | 122.05   |
| 1,20,13  | 116.6502 | 116.1968 |
| 1,20,15  | 121.9322 | 121.5747 |
| 13,20,15 | 121.3319 | 122.048  |
| 3,21,22  | 115.8007 | 117.5397 |
| 3,21,26  | 120.9253 | 119.1056 |
| 22,21,26 | 123.1749 | 123.3431 |
| 18,22,21 | 118.8017 | 119.0495 |
| 18,22,23 | 120.9386 | 120.3989 |
| 21,22,23 | 120.2483 | 120.5131 |
| 11,24,25 | 119.5224 | 119.7505 |
| 11,24,32 | 123.071  | 122.7214 |
| 25,24,32 | 117.4032 | 117.4994 |
| 12,26,21 | 114.9276 | 113.7437 |
| 12,26,31 | 122.5362 | 123.125  |
| 21,26,31 | 122.5362 | 123.1314 |
| 11,27,19 | 113.7557 | 111.3231 |
| 11,27,31 | 123.0958 | 123.2773 |
| 19,27,31 | 123.1485 | 125.3274 |
| 5,28,15  | 122.065  | 119.3987 |
| 5,28,29  | 116.5756 | 117.1825 |
| 15,28,29 | 121.2746 | 123.3673 |
| 8,29,28  | 123.071  | 122.7203 |
| 8,29,30  | 117.4032 | 117.5005 |
| 28,29,30 | 119.5224 | 119.7506 |
| 15,31,26 | 120.1366 | 118.8764 |
| 15,31,27 | 119.7268 | 122.2297 |
| 26,31,27 | 120.1366 | 118.8939 |
| 9,32,24  | 117.5422 | 116.5352 |

#### Dihedral angles of bisPyTM

| atoms | D <sub>0</sub> state | D <sub>1</sub> state |
|-------|----------------------|----------------------|
| ----- |                      |                      |



|             |           |           |
|-------------|-----------|-----------|
| 29,8,13,14  | -179.4666 | -177.7671 |
| 29,8,13,20  | -0.1403   | 0.338     |
| 13,8,29,28  | -0.1432   | -1.7025   |
| 13,8,29,30  | -179.4771 | -179.7492 |
| 10,9,19,2   | 2.9212    | 3.8673    |
| 10,9,19,27  | 179.6166  | 179.0514  |
| 32,9,19,2   | -176.3914 | -174.1991 |
| 32,9,19,27  | 0.304     | 0.985     |
| 10,9,32,24  | -179.4666 | -177.759  |
| 19,9,32,24  | -0.1402   | 0.345     |
| 4,11,24,25  | 2.8723    | 2.4777    |
| 4,11,24,32  | -176.4482 | -175.5243 |
| 27,11,24,25 | 179.5893  | 179.842   |
| 27,11,24,32 | 0.2688    | 1.8399    |
| 4,11,27,19  | 176.4349  | 176.8491  |
| 4,11,27,31  | -3.5193   | -6.0955   |
| 24,11,27,19 | -0.1003   | -0.4597   |
| 24,11,27,31 | 179.9456  | 176.5957  |
| 6,12,16,17  | 2.5462    | 1.8617    |
| 6,12,16,18  | -176.2348 | -175.8975 |
| 26,12,16,17 | 178.9512  | -179.3884 |
| 26,12,16,18 | 0.1702    | 2.8525    |
| 6,12,26,21  | 176.1401  | 177.2594  |
| 6,12,26,31  | -3.8599   | -2.7539   |
| 16,12,26,21 | -0.0867   | -1.4718   |
| 16,12,26,31 | 179.9134  | 178.5149  |
| 8,13,20,1   | -176.3914 | -174.2048 |
| 8,13,20,15  | 0.3041    | 0.9824    |
| 14,13,20,1  | 2.9211    | 3.8628    |
| 14,13,20,15 | 179.6166  | 179.0499  |
| 28,15,20,1  | 176.3522  | 174.0803  |
| 28,15,20,13 | -0.1674   | -0.8502   |
| 31,15,20,1  | -3.6936   | -2.8975   |
| 31,15,20,13 | 179.7867  | -177.828  |
| 20,15,28,5  | 176.4347  | 176.8426  |
| 20,15,28,29 | -0.1003   | -0.4696   |
| 31,15,28,5  | -3.5195   | -6.1066   |
| 31,15,28,29 | 179.9455  | 176.5813  |
| 20,15,31,26 | 131.669   | 140.103   |
| 20,15,31,27 | -48.331   | -39.8931  |

|             |           |           |
|-------------|-----------|-----------|
| 28,15,31,26 | -48.3811  | -36.5294  |
| 28,15,31,27 | 131.6189  | 143.4745  |
| 12,16,18,7  | 179.9181  | 178.6288  |
| 12,16,18,22 | -0.0819   | -1.3764   |
| 17,16,18,7  | 1.1459    | 0.8672    |
| 17,16,18,22 | -178.8542 | -179.138  |
| 7,18,22,21  | 179.9182  | 178.5915  |
| 7,18,22,23  | 1.1459    | 0.8377    |
| 16,18,22,21 | -0.0818   | -1.4034   |
| 16,18,22,23 | -178.8541 | -179.1572 |
| 2,19,27,11  | 176.3521  | 174.0665  |
| 2,19,27,31  | -3.6937   | -2.9161   |
| 9,19,27,11  | -0.1675   | -0.8606   |
| 9,19,27,31  | 179.7867  | -177.8432 |
| 3,21,22,18  | -176.2347 | -175.8938 |
| 3,21,22,23  | 2.5463    | 1.8574    |
| 26,21,22,18 | 0.1703    | 2.854     |
| 26,21,22,23 | 178.9513  | -179.3948 |
| 3,21,26,12  | 176.1399  | 177.2786  |
| 3,21,26,31  | -3.8602   | -2.7081   |
| 22,21,26,12 | -0.0869   | -1.4506   |
| 22,21,26,31 | 179.9131  | 178.5627  |
| 11,24,32,9  | -0.1432   | -1.7101   |
| 25,24,32,9  | -179.4772 | -179.7546 |
| 12,26,31,15 | -49.573   | -53.3534  |
| 12,26,31,27 | 130.427   | 126.6429  |
| 21,26,31,15 | 130.427   | 126.6321  |
| 21,26,31,27 | -49.573   | -53.3717  |
| 11,27,31,15 | 131.619   | 143.5156  |
| 11,27,31,26 | -48.381   | -36.4805  |
| 19,27,31,15 | -48.3309  | -39.847   |
| 19,27,31,26 | 131.6691  | 140.1569  |
| 5,28,29,8   | -176.448  | -175.5265 |
| 5,28,29,30  | 2.8724    | 2.4779    |
| 15,28,29,8  | 0.2689    | 1.8411    |
| 15,28,29,30 | 179.5893  | 179.8455  |

Bond lengths of PyBTM

| atoms | D <sub>0</sub> state | D <sub>1</sub> state |
|-------|----------------------|----------------------|
| 1,21  | 1.7524               | 1.7564               |
| 2,20  | 1.755                | 1.7508               |
| 3,22  | 1.7549               | 1.7434               |
| 4,12  | 1.7549               | 1.7432               |
| 5,32  | 1.7497               | 1.7414               |
| 6,29  | 1.7524               | 1.7565               |
| 7,13  | 1.755                | 1.751                |
| 8,19  | 1.7497               | 1.7416               |
| 9,14  | 1.3349               | 1.3377               |
| 9,30  | 1.3349               | 1.3377               |
| 10,11 | 1.0822               | 1.0827               |
| 10,20 | 1.3904               | 1.3821               |
| 10,32 | 1.391                | 1.4039               |
| 12,25 | 1.3906               | 1.3845               |
| 12,28 | 1.419                | 1.4488               |
| 13,17 | 1.3904               | 1.3822               |
| 13,27 | 1.419                | 1.4395               |
| 14,15 | 1.0861               | 1.0865               |
| 14,21 | 1.3935               | 1.3912               |
| 16,21 | 1.4161               | 1.4231               |
| 16,29 | 1.4161               | 1.4231               |
| 16,33 | 1.4748               | 1.4518               |
| 17,18 | 1.0822               | 1.0827               |
| 17,19 | 1.391                | 1.4037               |
| 19,23 | 1.391                | 1.3943               |
| 20,28 | 1.419                | 1.4397               |
| 22,23 | 1.3906               | 1.3846               |
| 22,27 | 1.419                | 1.4484               |
| 23,24 | 1.0822               | 1.0824               |
| 25,26 | 1.0822               | 1.0824               |
| 25,32 | 1.391                | 1.3944               |
| 27,33 | 1.4742               | 1.4528               |
| 28,33 | 1.4742               | 1.4529               |
| 29,30 | 1.3935               | 1.3912               |
| 30,31 | 1.0861               | 1.0865               |

Bond angles of PyBTM

-----

| atoms    | D <sub>0</sub> state | D <sub>1</sub> state |
|----------|----------------------|----------------------|
| -----    |                      |                      |
| 14,9,30  | 117.4339             | 116.6356             |
| 11,10,20 | 120.2562             | 120.1064             |
| 11,10,32 | 120.9445             | 120.2138             |
| 20,10,32 | 118.7873             | 119.6338             |
| 4,12,25  | 115.6145             | 116.8936             |
| 4,12,28  | 121.0434             | 118.7205             |
| 25,12,28 | 123.2453             | 124.3776             |
| 7,13,17  | 115.6684             | 116.1163             |
| 7,13,27  | 120.9337             | 120.2724             |
| 17,13,27 | 123.3007             | 123.4702             |
| 9,14,15  | 117.384              | 117.2314             |
| 9,14,21  | 123.0882             | 123.284              |
| 15,14,21 | 119.5239             | 119.4522             |
| 21,16,29 | 113.5613             | 111.6574             |
| 21,16,33 | 123.2192             | 124.1593             |
| 29,16,33 | 123.2195             | 124.1833             |
| 13,17,18 | 120.2561             | 120.1024             |
| 13,17,19 | 118.7881             | 119.6333             |
| 18,17,19 | 120.9438             | 120.2184             |
| 8,19,17  | 119.4581             | 119.3418             |
| 8,19,23  | 119.4709             | 119.8576             |
| 17,19,23 | 121.071              | 120.8003             |
| 2,20,10  | 115.6693             | 116.1379             |
| 2,20,28  | 120.9323             | 120.2564             |
| 10,20,28 | 123.3011             | 123.465              |
| 1,21,14  | 116.4665             | 116.694              |
| 1,21,16  | 122.0318             | 120.6135             |
| 14,21,16 | 121.4135             | 122.5626             |
| 3,22,23  | 115.6137             | 116.8768             |
| 3,22,27  | 121.0435             | 118.7251             |
| 23,22,27 | 123.2459             | 124.3896             |
| 19,23,22 | 118.832              | 118.5631             |
| 19,23,24 | 120.9252             | 120.91               |
| 22,23,24 | 120.2313             | 120.4713             |
| 12,25,26 | 120.2314             | 120.4724             |
| 12,25,32 | 118.8321             | 118.5664             |

|          |          |          |
|----------|----------|----------|
| 26,25,32 | 120.9249 | 120.9056 |
| 13,27,22 | 114.7617 | 113.0758 |
| 13,27,33 | 122.6058 | 124.2907 |
| 22,27,33 | 122.6325 | 122.6254 |
| 12,28,20 | 114.7623 | 113.081  |
| 12,28,33 | 122.6333 | 122.6278 |
| 20,28,33 | 122.6044 | 124.2833 |
| 6,29,16  | 122.0317 | 120.6337 |
| 6,29,30  | 116.4664 | 116.685  |
| 16,29,30 | 121.4137 | 122.551  |
| 9,30,29  | 123.0881 | 123.2952 |
| 9,30,31  | 117.3843 | 117.2265 |
| 29,30,31 | 119.5239 | 119.4461 |
| 5,32,10  | 119.4579 | 119.338  |
| 5,32,25  | 119.4708 | 119.8546 |
| 10,32,25 | 121.0713 | 120.8072 |
| 16,33,27 | 119.8666 | 119.6496 |
| 16,33,28 | 119.8634 | 119.6268 |
| 27,33,28 | 120.2699 | 120.7236 |

#### Dihedral angles of PyBTM

-----

| atoms       | D <sub>0</sub> state | D <sub>1</sub> state |
|-------------|----------------------|----------------------|
| 30,9,14,15  | -179.4589            | -178.4924            |
| 30,9,14,21  | -0.1735              | -0.578               |
| 14,9,30,29  | -0.1733              | -0.5613              |
| 14,9,30,31  | -179.4591            | -178.4814            |
| 11,10,20,2  | 2.567                | 3.0852               |
| 11,10,20,28 | 179.0048             | 178.7742             |
| 32,10,20,2  | -176.1869            | -174.4541            |
| 32,10,20,28 | 0.251                | 1.2349               |
| 11,10,32,5  | 1.1236               | 1.8887               |
| 11,10,32,25 | -178.8539            | -177.9453            |
| 20,10,32,5  | 179.8686             | 179.4253             |
| 20,10,32,25 | -0.1089              | -0.4086              |
| 4,12,25,26  | 2.5325               | 1.5938               |
| 4,12,25,32  | -176.2416            | -175.7185            |
| 28,12,25,26 | 178.9818             | -179.4697            |
| 28,12,25,32 | 0.2076               | 3.218                |

|             |           |           |
|-------------|-----------|-----------|
| 4,12,28,20  | 176.1871  | 176.5639  |
| 4,12,28,33  | -3.833    | -4.4177   |
| 25,12,28,20 | -0.0756   | -2.3546   |
| 25,12,28,33 | 179.9043  | 176.6638  |
| 7,13,17,18  | 2.564     | 3.0936    |
| 7,13,17,19  | -176.1894 | -174.4471 |
| 27,13,17,18 | 179.0027  | 178.7769  |
| 27,13,17,19 | 0.2492    | 1.2362    |
| 7,13,27,22  | 176.1059  | 175.5412  |
| 7,13,27,33  | -3.8689   | -3.4502   |
| 17,13,27,22 | -0.1517   | 0.0295    |
| 17,13,27,33 | 179.8736  | -178.9619 |
| 9,14,21,1   | -176.3004 | -174.7019 |
| 9,14,21,16  | 0.3507    | 1.1723    |
| 15,14,21,1  | 2.9703    | 3.1684    |
| 15,14,21,16 | 179.6214  | 179.0427  |
| 29,16,21,1  | 176.3     | 175.1725  |
| 29,16,21,14 | -0.1634   | -0.5443   |
| 33,16,21,1  | -3.6995   | -4.8358   |
| 33,16,21,14 | 179.837   | 179.4474  |
| 21,16,29,6  | 176.3007  | 175.1639  |
| 21,16,29,30 | -0.1644   | -0.548    |
| 33,16,29,6  | -3.6997   | -4.8278   |
| 33,16,29,30 | 179.8352  | 179.4602  |
| 21,16,33,27 | 132.0363  | 139.1278  |
| 21,16,33,28 | -47.9612  | -40.8602  |
| 29,16,33,27 | -47.9632  | -40.8815  |
| 29,16,33,28 | 132.0392  | 139.1305  |
| 13,17,19,8  | 179.8664  | 179.4498  |
| 13,17,19,23 | -0.1121   | -0.3797   |
| 18,17,19,8  | 1.1218    | 1.912     |
| 18,17,19,23 | -178.8567 | -177.9176 |
| 8,19,23,22  | 179.9134  | 178.4357  |
| 8,19,23,24  | 1.1477    | 1.1345    |
| 17,19,23,22 | -0.1081   | -1.7356   |
| 17,19,23,24 | -178.8738 | -179.0368 |
| 2,20,28,12  | 176.0987  | 175.5891  |
| 2,20,28,33  | -3.8813   | -3.4104   |
| 10,20,28,12 | -0.1581   | 0.0699    |
| 10,20,28,33 | 179.862   | -178.9296 |

|             |           |           |
|-------------|-----------|-----------|
| 3,22,23,19  | -176.2398 | -175.7382 |
| 3,22,23,24  | 2.5347    | 1.5752    |
| 27,22,23,19 | 0.2097    | 3.188     |
| 27,22,23,24 | 178.9842  | -179.4986 |
| 3,22,27,13  | 176.1808  | 176.6088  |
| 3,22,27,33  | -3.8445   | -4.3806   |
| 23,22,27,13 | -0.0822   | -2.299    |
| 23,22,27,33 | 179.8925  | 176.7116  |
| 12,25,32,5  | 179.9113  | 178.4456  |
| 12,25,32,10 | -0.1112   | -1.7213   |
| 26,25,32,5  | 1.1459    | 1.1454    |
| 26,25,32,10 | -178.8766 | -179.0215 |
| 13,27,33,16 | -49.1887  | -45.3428  |
| 13,27,33,28 | 130.8089  | 134.6451  |
| 22,27,33,16 | 130.8386  | 135.759   |
| 22,27,33,28 | -49.1639  | -44.2531  |
| 12,28,33,16 | 130.8226  | 135.6133  |
| 12,28,33,27 | -49.1749  | -44.3746  |
| 20,28,33,16 | -49.199   | -45.4796  |
| 20,28,33,27 | 130.8035  | 134.5325  |
| 6,29,30,9   | -176.3016 | -174.7052 |
| 6,29,30,31  | 2.9696    | 3.171     |
| 16,29,30,9  | 0.3511    | 1.1656    |
| 16,29,30,31 | 179.6223  | 179.0418  |

### Cartesian coordinates of all the optimized geometries by DFT calculations

bisPyTM (UB3LYP/6-31G(d,p)6D10F) (ground state in a vacuum)

---

| Center<br>Number | Atomic<br>Number | Atomic<br>Type | Coordinates (Angstroms) |           |           |
|------------------|------------------|----------------|-------------------------|-----------|-----------|
|                  |                  |                | X                       | Y         | Z         |
| 1                | 17               | 0              | -2.696032               | 0.408861  | -2.130627 |
| 2                | 17               | 0              | -2.696064               | -0.408591 | 2.130612  |
| 3                | 17               | 0              | 1.061614                | -1.708106 | 2.174670  |
| 4                | 17               | 0              | 0.383585                | -2.215729 | -2.118028 |
| 5                | 17               | 0              | 0.383784                | 2.215709  | 2.118014  |
| 6                | 17               | 0              | 1.061750                | 1.708038  | -2.174707 |
| 7                | 17               | 0              | 5.663014                | -0.000244 | -0.000039 |
| 8                | 7                | 0              | -2.572571               | 3.747861  | -0.014990 |
| 9                | 6                | 0              | -2.884769               | -2.763083 | 0.858596  |
| 10               | 1                | 0              | -3.699737               | -2.941457 | 1.554380  |
| 11               | 6                | 0              | -0.840922               | -2.345100 | -0.873454 |
| 12               | 6                | 0              | 1.839139                | 0.772131  | -0.913663 |
| 13               | 6                | 0              | -2.884525               | 2.763368  | -0.858605 |
| 14               | 1                | 0              | -3.699478               | 2.941817  | -1.554387 |
| 15               | 6                | 0              | -1.137068               | 1.275768  | -0.005725 |
| 16               | 6                | 0              | 3.229684                | 0.782666  | -0.923148 |
| 17               | 1                | 0              | 3.763933                | 1.377186  | -1.652791 |
| 18               | 6                | 0              | 3.915432                | -0.000165 | -0.000031 |
| 19               | 6                | 0              | -2.209573               | -1.544027 | 0.890248  |
| 20               | 6                | 0              | -2.209437               | 1.544252  | -0.890263 |
| 21               | 6                | 0              | 1.839076                | -0.772270 | 0.913619  |
| 22               | 6                | 0              | 3.229620                | -0.782932 | 0.923092  |
| 23               | 1                | 0              | 3.763822                | -1.377502 | 1.652730  |
| 24               | 6                | 0              | -1.565856               | -3.535234 | -0.832774 |
| 25               | 1                | 0              | -1.319234               | -4.335320 | -1.524991 |
| 26               | 6                | 0              | 1.076290                | -0.000035 | -0.000019 |
| 27               | 6                | 0              | -1.137181               | -1.275641 | 0.005708  |
| 28               | 6                | 0              | -0.840711               | 2.345195  | 0.873440  |
| 29               | 6                | 0              | -1.565539               | 3.535395  | 0.832765  |
| 30               | 1                | 0              | -1.318846               | 4.335457  | 1.524986  |
| 31               | 6                | 0              | -0.397403               | 0.000030  | -0.000013 |
| 32               | 7                | 0              | -2.572906               | -3.747607 | 0.014984  |

---



bisPyTM (UB3LYP/6-31g(d,p)6D10F) (lowest excited state in a vacuum)

---

| Center<br>Number | Atomic<br>Number | Atomic<br>Type | Coordinates (Angstroms) |           |           |
|------------------|------------------|----------------|-------------------------|-----------|-----------|
|                  |                  |                | X                       | Y         | Z         |
| 1                | 17               | 0              | -3.071063               | 0.434461  | -1.822878 |
| 2                | 17               | 0              | -3.068518               | -0.436003 | 1.825509  |
| 3                | 17               | 0              | 0.986700                | -1.662866 | 2.196163  |
| 4                | 17               | 0              | 0.680250                | -2.215920 | -1.832105 |
| 5                | 17               | 0              | 0.681189                | 2.218308  | 1.829174  |
| 6                | 17               | 0              | 0.987958                | 1.664487  | -2.194173 |
| 7                | 17               | 0              | 5.591163                | -0.001935 | 0.000276  |
| 8                | 7                | 0              | -2.460120               | 3.861185  | 0.064849  |
| 9                | 6                | 0              | -2.942309               | -2.838549 | 0.649190  |
| 10               | 1                | 0              | -3.830238               | -3.031605 | 1.245080  |
| 11               | 6                | 0              | -0.712669               | -2.391558 | -0.776562 |
| 12               | 6                | 0              | 1.788110                | 0.759004  | -0.950370 |
| 13               | 6                | 0              | -2.943907               | 2.837822  | -0.648668 |
| 14               | 1                | 0              | -3.832404               | 3.030168  | -1.243943 |
| 15               | 6                | 0              | -1.177496               | 1.265978  | 0.036352  |
| 16               | 6                | 0              | 3.168770                | 0.784192  | -0.935328 |
| 17               | 1                | 0              | 3.712767                | 1.375444  | -1.660953 |
| 18               | 6                | 0              | 3.856783                | -0.000859 | 0.000309  |
| 19               | 6                | 0              | -2.356491               | -1.577633 | 0.701652  |
| 20               | 6                | 0              | -2.358032               | 1.576922  | -0.700540 |
| 21               | 6                | 0              | 1.787391                | -0.758710 | 0.951578  |
| 22               | 6                | 0              | 3.167962                | -0.785138 | 0.936262  |
| 23               | 1                | 0              | 3.711558                | -1.376765 | 1.661887  |
| 24               | 6                | 0              | -1.341053               | -3.631781 | -0.756675 |
| 25               | 1                | 0              | -0.940360               | -4.450544 | -1.348118 |
| 26               | 6                | 0              | 0.991589                | 0.000318  | 0.000581  |
| 27               | 6                | 0              | -1.177032               | -1.265810 | -0.036452 |
| 28               | 6                | 0              | -0.712622               | 2.392756  | 0.774812  |
| 29               | 6                | 0              | -1.341178               | 3.632930  | 0.754346  |
| 30               | 1                | 0              | -0.939935               | 4.452315  | 1.344560  |
| 31               | 6                | 0              | -0.479161               | 0.000342  | 0.000130  |
| 32               | 7                | 0              | -2.459101               | -3.860970 | -0.065959 |

---

bisPyTM (UB3LYP/6-31g(d,p)6D10F) (ground state in dichloromethane)

---

| Center<br>Number | Atomic<br>Number | Atomic<br>Type | Coordinates (Angstroms) |           |           |
|------------------|------------------|----------------|-------------------------|-----------|-----------|
|                  |                  |                | X                       | Y         | Z         |
| 1                | 17               | 0              | -2.688146               | 0.409536  | -2.136257 |
| 2                | 17               | 0              | -2.688168               | -0.409271 | 2.136247  |
| 3                | 17               | 0              | 1.059438                | -1.704346 | 2.177615  |
| 4                | 17               | 0              | 0.377408                | -2.211042 | -2.123315 |
| 5                | 17               | 0              | 0.377614                | 2.211029  | 2.123289  |
| 6                | 17               | 0              | 1.059578                | 1.704282  | -2.177648 |
| 7                | 17               | 0              | 5.663184                | -0.000247 | -0.000037 |
| 8                | 7                | 0              | -2.573438               | 3.746971  | -0.015843 |
| 9                | 6                | 0              | -2.883824               | -2.762855 | 0.862850  |
| 10               | 1                | 0              | -3.696690               | -2.941383 | 1.560652  |
| 11               | 6                | 0              | -0.843899               | -2.343853 | -0.875142 |
| 12               | 6                | 0              | 1.840323                | 0.771137  | -0.914317 |
| 13               | 6                | 0              | -2.883584               | 2.763138  | -0.862857 |
| 14               | 1                | 0              | -3.696439               | 2.941738  | -1.560654 |
| 15               | 6                | 0              | -1.136843               | 1.275730  | -0.006233 |
| 16               | 6                | 0              | 3.230539                | 0.782412  | -0.925033 |
| 17               | 1                | 0              | 3.765296                | 1.375781  | -1.655196 |
| 18               | 6                | 0              | 3.914349                | -0.000165 | -0.000029 |
| 19               | 6                | 0              | -2.206995               | -1.545046 | 0.892850  |
| 20               | 6                | 0              | -2.206864               | 1.545268  | -0.892863 |
| 21               | 6                | 0              | 1.840260                | -0.771275 | 0.914277  |
| 22               | 6                | 0              | 3.230475                | -0.782679 | 0.924982  |
| 23               | 1                | 0              | 3.765182                | -1.376097 | 1.655141  |
| 24               | 6                | 0              | -1.568116               | -3.534139 | -0.835466 |
| 25               | 1                | 0              | -1.323412               | -4.332872 | -1.529513 |
| 26               | 6                | 0              | 1.077217                | -0.000035 | -0.000018 |
| 27               | 6                | 0              | -1.136956               | -1.275604 | 0.006213  |
| 28               | 6                | 0              | -0.843686               | 2.343952  | 0.875123  |
| 29               | 6                | 0              | -1.567798               | 3.534302  | 0.835451  |
| 30               | 1                | 0              | -1.323018               | 4.333013  | 1.529499  |
| 31               | 6                | 0              | -0.396323               | 0.000030  | -0.000013 |
| 32               | 7                | 0              | -2.573771               | -3.746718 | 0.015834  |

---

bisPyTM (UB3LYP/6-31g(d,p)6D10F) (lowest excited state in dichloromethane)

---

| Center<br>Number | Atomic<br>Number | Atomic<br>Type | Coordinates (Angstroms) |           |           |
|------------------|------------------|----------------|-------------------------|-----------|-----------|
|                  |                  |                | X                       | Y         | Z         |
| 1                | 17               | 0              | -3.064091               | 0.434579  | -1.827730 |
| 2                | 17               | 0              | -3.064901               | -0.434111 | 1.826986  |
| 3                | 17               | 0              | 0.984853                | -1.652568 | 2.203053  |
| 4                | 17               | 0              | 0.683015                | -2.217731 | -1.831467 |
| 5                | 17               | 0              | 0.682526                | 2.216036  | 1.832963  |
| 6                | 17               | 0              | 0.983879                | 1.651680  | -2.203801 |
| 7                | 17               | 0              | 5.585826                | 0.001844  | 0.000160  |
| 8                | 7                | 0              | -2.464759               | 3.858151  | 0.074734  |
| 9                | 6                | 0              | -2.946369               | -2.834494 | 0.644108  |
| 10               | 1                | 0              | -3.836556               | -3.024508 | 1.237541  |
| 11               | 6                | 0              | -0.712704               | -2.391331 | -0.781007 |
| 12               | 6                | 0              | 1.790893                | 0.756281  | -0.955721 |
| 13               | 6                | 0              | -2.945243               | 2.834820  | -0.644482 |
| 14               | 1                | 0              | -3.835074               | 3.025284  | -1.238303 |
| 15               | 6                | 0              | -1.173442               | 1.265095  | 0.038254  |
| 16               | 6                | 0              | 3.169274                | 0.783119  | -0.941647 |
| 17               | 1                | 0              | 3.714901                | 1.370127  | -1.669243 |
| 18               | 6                | 0              | 3.856967                | 0.000739  | -0.000068 |
| 19               | 6                | 0              | -2.354267               | -1.578305 | 0.698520  |
| 20               | 6                | 0              | -2.353573               | 1.578404  | -0.698839 |
| 21               | 6                | 0              | 1.791441                | -0.756466 | 0.955262  |
| 22               | 6                | 0              | 3.169901                | -0.782337 | 0.941278  |
| 23               | 1                | 0              | 3.715994                | -1.368996 | 1.668815  |
| 24               | 6                | 0              | -1.345132               | -3.628854 | -0.764836 |
| 25               | 1                | 0              | -0.944021               | -4.447040 | -1.356443 |
| 26               | 6                | 0              | 0.995896                | -0.000257 | -0.000203 |
| 27               | 6                | 0              | -1.173656               | -1.265503 | -0.038085 |
| 28               | 6                | 0              | -0.712511               | 2.390473  | 0.781765  |
| 29               | 6                | 0              | -1.344459               | 3.628238  | 0.765537  |
| 30               | 1                | 0              | -0.943378               | 4.446131  | 1.357580  |
| 31               | 6                | 0              | -0.475177               | -0.000330 | 0.000017  |
| 32               | 7                | 0              | -2.465931               | -3.858182 | -0.074672 |

---

PyBTM (UB3LYP/6-31g(d,p)6D10F) (ground state in a vacuum)

---

| Center<br>Number | Atomic<br>Number | Atomic<br>Type | Coordinates (Angstroms) |           |           |
|------------------|------------------|----------------|-------------------------|-----------|-----------|
|                  |                  |                | X                       | Y         | Z         |
| 1                | 17               | 0              | 1.801933                | 1.890771  | 2.111356  |
| 2                | 17               | 0              | 2.125382                | 1.140738  | -2.162530 |
| 3                | 17               | 0              | -0.410804               | -1.866068 | -2.155860 |
| 4                | 17               | 0              | 0.411772                | -1.864619 | 2.156862  |
| 5                | 17               | 0              | 5.259212                | -2.648701 | -0.009520 |
| 6                | 17               | 0              | -1.803179               | 1.888491  | -2.112487 |
| 7                | 17               | 0              | -2.126177               | 1.140696  | 2.161848  |
| 8                | 17               | 0              | -5.257781               | -2.651792 | 0.010967  |
| 9                | 7                | 0              | -0.001467               | 4.704812  | -0.001365 |
| 10               | 6                | 0              | 3.540167                | -0.750260 | -0.921150 |
| 11               | 1                | 0              | 4.301794                | -0.493146 | -1.645770 |
| 12               | 6                | 0              | 1.553671                | -1.423794 | 0.901700  |
| 13               | 6                | 0              | -2.328244               | -0.069368 | 0.909656  |
| 14               | 6                | 0              | 0.769780                | 4.012221  | 0.837616  |
| 15               | 1                | 0              | 1.390689                | 4.577912  | 1.526565  |
| 16               | 6                | 0              | -0.000612               | 1.843285  | -0.000550 |
| 17               | 6                | 0              | -3.539852               | -0.751830 | 0.921532  |
| 18               | 1                | 0              | -4.301629               | -0.494758 | 1.646007  |
| 19               | 6                | 0              | -3.741747               | -1.781060 | 0.007960  |
| 20               | 6                | 0              | 2.328158                | -0.068504 | -0.909657 |
| 21               | 6                | 0              | 0.798830                | 2.619159  | 0.874025  |
| 22               | 6                | 0              | -1.552962               | -1.425216 | -0.900944 |
| 23               | 6                | 0              | -2.753651               | -2.127151 | -0.907708 |
| 24               | 1                | 0              | -2.917982               | -2.915832 | -1.630355 |
| 25               | 6                | 0              | 2.754773                | -2.125018 | 0.908858  |
| 26               | 1                | 0              | 2.919567                | -2.913198 | 1.631947  |
| 27               | 6                | 0              | -1.277935               | -0.366252 | 0.002694  |
| 28               | 6                | 0              | 1.278022                | -0.365498 | -0.002531 |
| 29               | 6                | 0              | -0.800516               | 2.618182  | -0.875568 |
| 30               | 6                | 0              | -0.772298               | 4.011283  | -0.839952 |
| 31               | 1                | 0              | -1.393545               | 4.576209  | -1.529223 |
| 32               | 6                | 0              | 3.742667                | -1.778859 | -0.007002 |
| 33               | 6                | 0              | -0.000173               | 0.368889  | -0.000127 |

---

PyBTM (UB3LYP/6-31g(d,p)6D10F) (lowest excited state in a vacuum)

---

| Center<br>Number | Atomic<br>Number | Atomic<br>Type | Coordinates (Angstroms) |           |           |
|------------------|------------------|----------------|-------------------------|-----------|-----------|
|                  |                  |                | X                       | Y         | Z         |
| 1                | 17               | 0              | 2.148695                | 2.014049  | 1.736237  |
| 2                | 17               | 0              | 2.239144                | 1.181851  | -2.057398 |
| 3                | 17               | 0              | -0.328022               | -1.797492 | -2.195099 |
| 4                | 17               | 0              | 0.328296                | -1.796926 | 2.195400  |
| 5                | 17               | 0              | 5.151003                | -2.810963 | 0.053730  |
| 6                | 17               | 0              | -2.147954               | 2.013966  | -1.736747 |
| 7                | 17               | 0              | -2.239455               | 1.182692  | 2.056489  |
| 8                | 17               | 0              | -5.150940               | -2.810854 | -0.053709 |
| 9                | 7                | 0              | -0.000361               | 4.791582  | 0.000450  |
| 10               | 6                | 0              | 3.538016                | -0.806435 | -0.838227 |
| 11               | 1                | 0              | 4.323726                | -0.566834 | -1.542970 |
| 12               | 6                | 0              | 1.497599                | -1.408964 | 0.943696  |
| 13               | 6                | 0              | -2.353187               | -0.077434 | 0.834368  |
| 14               | 6                | 0              | 0.920634                | 4.088098  | 0.650262  |
| 15               | 1                | 0              | 1.598802                | 4.631932  | 1.301896  |
| 16               | 6                | 0              | 0.000133                | 1.839628  | 0.000018  |
| 17               | 6                | 0              | -3.538118               | -0.805998 | 0.837812  |
| 18               | 1                | 0              | -4.323945               | -0.566125 | 1.542333  |
| 19               | 6                | 0              | -3.676264               | -1.864682 | -0.052206 |
| 20               | 6                | 0              | 2.353102                | -0.077840 | -0.834821 |
| 21               | 6                | 0              | 0.981212                | 2.672189  | 0.644678  |
| 22               | 6                | 0              | -1.497395               | -1.409141 | -0.943597 |
| 23               | 6                | 0              | -2.657418               | -2.175901 | -0.947868 |
| 24               | 1                | 0              | -2.773193               | -2.983069 | -1.659729 |
| 25               | 6                | 0              | 2.657620                | -2.175739 | 0.948071  |
| 26               | 1                | 0              | 2.773489                | -2.982682 | 1.660169  |
| 27               | 6                | 0              | -1.262232               | -0.330448 | -0.046057 |
| 28               | 6                | 0              | 1.262359                | -0.330548 | 0.045891  |
| 29               | 6                | 0              | -0.981085               | 2.672170  | -0.644639 |
| 30               | 6                | 0              | -0.921134               | 4.088136  | -0.649597 |
| 31               | 1                | 0              | -1.599548               | 4.631997  | -1.300953 |
| 32               | 6                | 0              | 3.676309                | -1.864805 | 0.052151  |
| 33               | 6                | 0              | 0.000072                | 0.421575  | -0.000033 |

---

PyBTM (UB3LYP/6-31g(d,p)6D10F) (ground state in dichloromethane)

| Center<br>Number | Atomic<br>Number | Atomic<br>Type | Coordinates (Angstroms) |           |           |
|------------------|------------------|----------------|-------------------------|-----------|-----------|
|                  |                  |                | X                       | Y         | Z         |
| 1                | 17               | 0              | 1.790843                | 1.888710  | 2.120152  |
| 2                | 17               | 0              | 2.121719                | 1.141060  | -2.164530 |
| 3                | 17               | 0              | -0.411461               | -1.864014 | -2.157363 |
| 4                | 17               | 0              | 0.412367                | -1.862435 | 2.158344  |
| 5                | 17               | 0              | 5.259749                | -2.648217 | -0.012761 |
| 6                | 17               | 0              | -1.792062               | 1.886800  | -2.121279 |
| 7                | 17               | 0              | -2.122902               | 1.141466  | 2.163349  |
| 8                | 17               | 0              | -5.258179               | -2.651721 | 0.014484  |
| 9                | 7                | 0              | -0.001332               | 4.704753  | -0.001229 |
| 10               | 6                | 0              | 3.540727                | -0.749419 | -0.923784 |
| 11               | 1                | 0              | 4.302114                | -0.492667 | -1.648726 |
| 12               | 6                | 0              | 1.555356                | -1.423806 | 0.901051  |
| 13               | 6                | 0              | -2.328628               | -0.069603 | 0.910006  |
| 14               | 6                | 0              | 0.767184                | 4.012001  | 0.842172  |
| 15               | 1                | 0              | 1.385130                | 4.577085  | 1.533917  |
| 16               | 6                | 0              | -0.000593               | 1.842986  | -0.000560 |
| 17               | 6                | 0              | -3.540508               | -0.750994 | 0.924039  |
| 18               | 1                | 0              | -4.302080               | -0.494239 | 1.648784  |
| 19               | 6                | 0              | -3.740966               | -1.780193 | 0.009955  |
| 20               | 6                | 0              | 2.328366                | -0.068874 | -0.910251 |
| 21               | 6                | 0              | 0.794500                | 2.619207  | 0.877325  |
| 22               | 6                | 0              | -1.554693               | -1.425321 | -0.900318 |
| 23               | 6                | 0              | -2.754722               | -2.127962 | -0.907234 |
| 24               | 1                | 0              | -2.919982               | -2.917018 | -1.629232 |
| 25               | 6                | 0              | 2.755880                | -2.125598 | 0.908490  |
| 26               | 1                | 0              | 2.921684                | -2.914023 | 1.631052  |
| 27               | 6                | 0              | -1.278461               | -0.366287 | 0.002907  |
| 28               | 6                | 0              | 1.278431                | -0.365584 | -0.002903 |
| 29               | 6                | 0              | -0.796079               | 2.618388  | -0.878812 |
| 30               | 6                | 0              | -0.769487               | 4.011211  | -0.844309 |
| 31               | 1                | 0              | -1.387731               | 4.575650  | -1.536314 |
| 32               | 6                | 0              | 3.741903                | -1.777785 | -0.008922 |
| 33               | 6                | 0              | -0.000225               | 0.368168  | -0.000203 |

PyBTM (UB3LYP/6-31g(d,p)6D10F) (lowest excited state in dichloromethane)

| Center<br>Number | Atomic<br>Number | Atomic<br>Type | Coordinates (Angstroms) |           |           |
|------------------|------------------|----------------|-------------------------|-----------|-----------|
|                  |                  |                | X                       | Y         | Z         |
| 1                | 17               | 0              | 1.999562                | 1.902810  | 1.911835  |
| 2                | 17               | 0              | 2.250830                | 1.280610  | -2.029010 |
| 3                | 17               | 0              | -0.278280               | -1.936059 | -2.002002 |
| 4                | 17               | 0              | 0.281118                | -1.932035 | 2.006460  |
| 5                | 17               | 0              | 5.203686                | -2.716446 | -0.007936 |
| 6                | 17               | 0              | -1.999932               | 1.905591  | -1.911698 |
| 7                | 17               | 0              | -2.253740               | 1.282587  | 2.026003  |
| 8                | 17               | 0              | -5.204467               | -2.716346 | 0.005617  |
| 9                | 7                | 0              | 0.000749                | 4.740943  | 0.001162  |
| 10               | 6                | 0              | 3.569697                | -0.705911 | -0.836590 |
| 11               | 1                | 0              | 4.370844                | -0.426350 | -1.509030 |
| 12               | 6                | 0              | 1.507403                | -1.466035 | 0.858556  |
| 13               | 6                | 0              | -2.384146               | 0.003223  | 0.837629  |
| 14               | 6                | 0              | 0.866029                | 4.037940  | 0.740343  |
| 15               | 1                | 0              | 1.556907                | 4.598259  | 1.364179  |
| 16               | 6                | 0              | -0.000168               | 1.848439  | 0.000217  |
| 17               | 6                | 0              | -3.570964               | -0.705249 | 0.834081  |
| 18               | 1                | 0              | -4.372821               | -0.424740 | 1.505276  |
| 19               | 6                | 0              | -3.710945               | -1.820578 | -0.006566 |
| 20               | 6                | 0              | 2.383031                | 0.002559  | -0.839664 |
| 21               | 6                | 0              | 0.887701                | 2.647285  | 0.774028  |
| 22               | 6                | 0              | -1.506406               | -1.467589 | -0.856737 |
| 23               | 6                | 0              | -2.669807               | -2.218276 | -0.844383 |
| 24               | 1                | 0              | -2.781331               | -3.068766 | -1.504624 |
| 25               | 6                | 0              | 2.670653                | -2.216783 | 0.845426  |
| 26               | 1                | 0              | 2.783177                | -3.066347 | 1.506690  |
| 27               | 6                | 0              | -1.262919               | -0.321957 | -0.004573 |
| 28               | 6                | 0              | 1.262621                | -0.321682 | 0.004377  |
| 29               | 6                | 0              | -0.887543               | 2.648229  | -0.773190 |
| 30               | 6                | 0              | -0.864850               | 4.038844  | -0.738555 |
| 31               | 1                | 0              | -1.555328               | 4.599998  | -1.362085 |
| 32               | 6                | 0              | 3.710600                | -1.820381 | 0.005396  |
| 33               | 6                | 0              | -0.000274               | 0.396652  | -0.000083 |

## Abstracted results of TDDFT calculations

bisPyTM (UB3LYP/6-31g(d,p)6D10F) (ground state in a vacuum)

121A is SOMO.

Excited State 1: 2.124-A 2.5067 eV 494.62 nm f=0.0066 <S\*\*2>=0.878  
121A ->123A 0.12819  
117B ->121B 0.31417  
120B ->121B 0.91989

Excited State 2: 2.112-A 2.5690 eV 482.62 nm f=0.0055 <S\*\*2>=0.865  
119B ->121B 0.97802

Excited State 3: 2.150-A 2.6601 eV 466.08 nm f=0.0254 <S\*\*2>=0.906  
121A ->123A 0.18501  
117B ->121B 0.89008  
120B ->121B -0.34783

Excited State 4: 2.102-A 2.7100 eV 457.50 nm f=0.0045 <S\*\*2>=0.855  
114B ->121B -0.14851  
116B ->121B 0.15332  
118B ->121B 0.95182

Excited State 5: 2.216-A 2.8628 eV 433.09 nm f=0.0063 <S\*\*2>=0.978  
121A ->122A 0.28465  
114B ->121B -0.42476  
116B ->121B 0.77007  
118B ->121B -0.24718

Excited State 6: 2.251-A 2.9908 eV 414.55 nm f=0.0021 <S\*\*2>=1.017  
121A ->123A 0.14848  
115B ->121B 0.93311  
116B ->122B 0.16639  
117B ->121B -0.11239

Excited State 7: 2.277-A 3.0197 eV 410.58 nm f=0.0006 <S\*\*2>=1.046  
121A ->122A -0.24035  
114B ->121B 0.73168  
115B ->122B 0.15702  
116B ->121B 0.54354



Excited State 8: 2.462-A 3.2475 eV 381.78 nm f=0.0028 <S\*\*2>=1.266

|             |          |
|-------------|----------|
| 114A ->122A | 0.15970  |
| 116A ->122A | -0.11176 |
| 117A ->123A | -0.11575 |
| 119A ->125A | -0.13661 |
| 120A ->126A | 0.14474  |
| 121A ->123A | -0.21377 |
| 121A ->128A | -0.19551 |
| 112B ->121B | -0.11507 |
| 113B ->121B | 0.80622  |
| 114B ->122B | 0.12197  |
| 116B ->122B | -0.10664 |
| 119B ->125B | -0.14342 |
| 120B ->126B | 0.14685  |

Excited State 9: 2.685-A 3.4234 eV 362.16 nm f=0.1105 <S\*\*2>=1.552

|             |          |
|-------------|----------|
| 117A ->123A | -0.13762 |
| 118A ->124A | -0.25637 |
| 118A ->125A | 0.14748  |
| 121A ->123A | 0.72115  |
| 113B ->121B | 0.18342  |
| 115B ->121B | -0.22144 |
| 115B ->123B | 0.12151  |
| 117B ->121B | -0.24510 |
| 117B ->123B | 0.22356  |
| 118B ->124B | -0.21414 |
| 118B ->125B | 0.12644  |
| 120B ->123B | 0.11407  |

Excited State 10: 2.214-A 3.4554 eV 358.81 nm f=0.1086 <S\*\*2>=0.976

|             |          |
|-------------|----------|
| 119A ->126A | 0.11797  |
| 121A ->122A | 0.82180  |
| 114B ->121B | 0.45149  |
| 116B ->121B | -0.15078 |

bisPyTM (UB3LYP/6-31g(d,p)6D10F) (lowest excited state in a vacuum)

121A is SOMO.

|               |    |             |           |           |          |              |
|---------------|----|-------------|-----------|-----------|----------|--------------|
| Excited State | 1: | 2.085-A     | 1.9718 eV | 628.80 nm | f=0.0189 | <S**2>=0.837 |
|               |    | 121A ->123A | 0.12597   |           |          |              |
|               |    | 120B ->121B | 0.97920   |           |          |              |
| Excited State | 2: | 2.087-A     | 2.2380 eV | 554.00 nm | f=0.0068 | <S**2>=0.839 |
|               |    | 119B ->121B | 0.98141   |           |          |              |
| Excited State | 3: | 2.106-A     | 2.4217 eV | 511.96 nm | f=0.0184 | <S**2>=0.859 |
|               |    | 118B ->121B | 0.97613   |           |          |              |
| Excited State | 4: | 2.086-A     | 2.4400 eV | 508.14 nm | f=0.0048 | <S**2>=0.838 |
|               |    | 121A ->122A | -0.12448  |           |          |              |
|               |    | 114B ->121B | 0.15308   |           |          |              |
|               |    | 116B ->121B | 0.21081   |           |          |              |
|               |    | 117B ->121B | 0.93743   |           |          |              |
|               |    | 119B ->121B | 0.11038   |           |          |              |
| Excited State | 5: | 2.146-A     | 2.6641 eV | 465.39 nm | f=0.0111 | <S**2>=0.901 |
|               |    | 121A ->122A | -0.25642  |           |          |              |
|               |    | 114B ->121B | 0.35005   |           |          |              |
|               |    | 116B ->121B | 0.81742   |           |          |              |
|               |    | 117B ->121B | -0.29882  |           |          |              |
| Excited State | 6: | 2.194-A     | 2.7359 eV | 453.17 nm | f=0.0007 | <S**2>=0.954 |
|               |    | 114B ->122B | -0.10990  |           |          |              |
|               |    | 115B ->121B | 0.95969   |           |          |              |
|               |    | 116B ->122B | 0.13795   |           |          |              |
| Excited State | 7: | 2.202-A     | 2.7640 eV | 448.56 nm | f=0.0025 | <S**2>=0.962 |
|               |    | 121A ->122A | -0.17510  |           |          |              |
|               |    | 114B ->121B | 0.83043   |           |          |              |
|               |    | 115B ->122B | -0.16695  |           |          |              |
|               |    | 116B ->121B | -0.44550  |           |          |              |
| Excited State | 8: | 2.709-A     | 3.1163 eV | 397.85 nm | f=0.0462 | <S**2>=1.584 |
|               |    | 118A ->124A | -0.15388  |           |          |              |
|               |    | 118A ->126A | 0.10825   |           |          |              |
|               |    | 120A ->123A | -0.18856  |           |          |              |
|               |    | 120A ->128A | 0.10701   |           |          |              |

|             |          |
|-------------|----------|
| 121A ->123A | 0.69312  |
| 112B ->121B | 0.13952  |
| 113B ->121B | -0.35326 |
| 115B ->121B | -0.10547 |
| 117B ->124B | -0.12932 |
| 118B ->121B | -0.11249 |
| 120B ->121B | -0.15995 |
| 120B ->123B | 0.34808  |

Excited State 9: 2.592-A 3.1753 eV 390.46 nm f=0.0123 <S\*\*2>=1.430

|             |          |
|-------------|----------|
| 114A ->122A | 0.10730  |
| 116A ->122A | 0.10122  |
| 117A ->123A | -0.11537 |
| 120A ->123A | -0.26306 |
| 121A ->123A | 0.16258  |
| 121A ->128A | -0.19945 |
| 113B ->121B | 0.77644  |
| 118B ->123B | 0.10188  |
| 120B ->123B | 0.25304  |

Excited State 10: 2.190-A 3.4233 eV 362.18 nm f=0.1473 <S\*\*2>=0.949

|             |          |
|-------------|----------|
| 119A ->125A | 0.13035  |
| 121A ->122A | 0.85401  |
| 104B ->121B | -0.11862 |
| 114B ->121B | 0.34324  |
| 116B ->121B | 0.20708  |

bisPyTM (UB3LYP/6-31g(d,p)6D10F) (ground state in dichloromethane)

121A is SOMO.

Excited State 1: 2.123-A 2.4985 eV 496.24 nm f=0.0153 <S\*\*2>=0.877

|             |         |
|-------------|---------|
| 121A ->123A | 0.13266 |
| 117B ->121B | 0.34752 |
| 120B ->121B | 0.90635 |

Excited State 2: 2.114-A 2.5802 eV 480.52 nm f=0.0065 <S\*\*2>=0.867

|             |         |
|-------------|---------|
| 119B ->121B | 0.97803 |
|-------------|---------|

|               |    |             |           |           |          |              |
|---------------|----|-------------|-----------|-----------|----------|--------------|
| Excited State | 3: | 2.139-A     | 2.6509 eV | 467.70 nm | f=0.0335 | <S**2>=0.894 |
|               |    | 121A ->123A | 0.15048   |           |          |              |
|               |    | 117B ->121B | 0.88797   |           |          |              |
|               |    | 120B ->121B | -0.37871  |           |          |              |
| Excited State | 4: | 2.087-A     | 2.6624 eV | 465.69 nm | f=0.0070 | <S**2>=0.839 |
|               |    | 118B ->121B | 0.97675   |           |          |              |
| Excited State | 5: | 2.246-A     | 2.8738 eV | 431.42 nm | f=0.0087 | <S**2>=1.011 |
|               |    | 121A ->122A | -0.32698  |           |          |              |
|               |    | 114B ->121B | 0.42580   |           |          |              |
|               |    | 116B ->121B | 0.76897   |           |          |              |
|               |    | 118B ->121B | -0.13843  |           |          |              |
| Excited State | 6: | 2.247-A     | 3.0643 eV | 404.61 nm | f=0.0016 | <S**2>=1.012 |
|               |    | 121A ->123A | 0.12048   |           |          |              |
|               |    | 114B ->122B | 0.11516   |           |          |              |
|               |    | 115B ->121B | 0.94049   |           |          |              |
|               |    | 116B ->122B | -0.14531  |           |          |              |
| Excited State | 7: | 2.270-A     | 3.0949 eV | 400.61 nm | f=0.0002 | <S**2>=1.038 |
|               |    | 121A ->122A | -0.22224  |           |          |              |
|               |    | 114B ->121B | 0.73876   |           |          |              |
|               |    | 115B ->122B | 0.18045   |           |          |              |
|               |    | 116B ->121B | -0.54852  |           |          |              |
| Excited State | 8: | 2.468-A     | 3.2519 eV | 381.27 nm | f=0.0066 | <S**2>=1.273 |
|               |    | 114A ->122A | 0.13589   |           |          |              |
|               |    | 116A ->122A | 0.14612   |           |          |              |
|               |    | 117A ->123A | -0.10594  |           |          |              |
|               |    | 119A ->124A | 0.11351   |           |          |              |
|               |    | 119A ->125A | 0.11048   |           |          |              |
|               |    | 120A ->126A | -0.14484  |           |          |              |
|               |    | 121A ->123A | -0.28447  |           |          |              |
|               |    | 121A ->128A | -0.17646  |           |          |              |
|               |    | 112B ->121B | -0.12066  |           |          |              |
|               |    | 113B ->121B | 0.78459   |           |          |              |
|               |    | 116B ->122B | 0.13888   |           |          |              |
|               |    | 117B ->121B | 0.10899   |           |          |              |
|               |    | 119B ->124B | -0.12238  |           |          |              |

119B ->125B -0.11997  
120B ->126B 0.14089

Excited State 9: 2.706-A 3.4123 eV 363.35 nm f=0.1338 <S\*\*2>=1.580

117A ->123A -0.15288  
118A ->124A -0.21383  
118A ->125A 0.18169  
121A ->123A 0.71367  
121A ->128A -0.10664  
113B ->121B 0.24568  
115B ->121B -0.19244  
117B ->121B -0.21812  
117B ->123B 0.22620  
118B ->124B 0.19157  
118B ->125B -0.16786  
120B ->123B 0.13269

Excited State 10: 2.172-A 3.4200 eV 362.53 nm f=0.1412 <S\*\*2>=0.930

121A ->122A 0.83159  
114B ->121B 0.44211  
116B ->121B 0.20067

bisPyTM (UB3LYP/6-31g(d,p)6D10F) (lowest excited state in dichloromethane)

121A is SOMO.

Excited State 1: 2.078-A 1.9295 eV 642.56 nm f=0.0290 <S\*\*2>=0.830

121A ->123A 0.11490  
120B ->121B 0.98150

Excited State 2: 2.088-A 2.2450 eV 552.26 nm f=0.0096 <S\*\*2>=0.840

118B ->121B 0.12697  
119B ->121B 0.97842

Excited State 3: 2.076-A 2.4019 eV 516.20 nm f=0.0040 <S\*\*2>=0.828

116B ->121B -0.19168  
118B ->121B 0.95277  
119B ->121B -0.13746

|               |    |             |           |           |          |              |
|---------------|----|-------------|-----------|-----------|----------|--------------|
| Excited State | 4: | 2.104-A     | 2.4186 eV | 512.62 nm | f=0.0239 | <S**2>=0.857 |
|               |    | 117B ->121B | 0.97908   |           |          |              |
| Excited State | 5: | 2.158-A     | 2.6550 eV | 466.99 nm | f=0.0181 | <S**2>=0.915 |
|               |    | 121A ->122A | -0.28745  |           |          |              |
|               |    | 114B ->121B | 0.27503   |           |          |              |
|               |    | 116B ->121B | 0.84884   |           |          |              |
|               |    | 118B ->121B | 0.24435   |           |          |              |
| Excited State | 6: | 2.199-A     | 2.8183 eV | 439.92 nm | f=0.0006 | <S**2>=0.959 |
|               |    | 114B ->122B | -0.14808  |           |          |              |
|               |    | 115B ->121B | 0.95796   |           |          |              |
| Excited State | 7: | 2.198-A     | 2.8459 eV | 435.65 nm | f=0.0009 | <S**2>=0.958 |
|               |    | 121A ->122A | -0.13118  |           |          |              |
|               |    | 114B ->121B | 0.88503   |           |          |              |
|               |    | 115B ->122B | -0.17983  |           |          |              |
|               |    | 116B ->121B | -0.35321  |           |          |              |
| Excited State | 8: | 2.791-A     | 3.0968 eV | 400.37 nm | f=0.0646 | <S**2>=1.698 |
|               |    | 118A ->124A | 0.12963   |           |          |              |
|               |    | 118A ->126A | 0.13844   |           |          |              |
|               |    | 120A ->123A | -0.21807  |           |          |              |
|               |    | 120A ->128A | 0.11355   |           |          |              |
|               |    | 121A ->123A | 0.71670   |           |          |              |
|               |    | 112B ->121B | 0.13036   |           |          |              |
|               |    | 113B ->121B | 0.25790   |           |          |              |
|               |    | 115B ->121B | -0.11588  |           |          |              |
|               |    | 118B ->124B | -0.11809  |           |          |              |
|               |    | 118B ->126B | -0.11130  |           |          |              |
|               |    | 120B ->121B | -0.15591  |           |          |              |
|               |    | 120B ->123B | 0.38083   |           |          |              |
|               |    | 120B ->130B | -0.10191  |           |          |              |
| Excited State | 9: | 2.515-A     | 3.1750 eV | 390.51 nm | f=0.0096 | <S**2>=1.332 |
|               |    | 116A ->122A | -0.13950  |           |          |              |
|               |    | 119A ->124A | -0.10704  |           |          |              |
|               |    | 120A ->123A | 0.24440   |           |          |              |
|               |    | 121A ->128A | 0.19784   |           |          |              |
|               |    | 112B ->121B | 0.12874   |           |          |              |

|             |          |
|-------------|----------|
| 113B ->121B | 0.80851  |
| 116B ->122B | 0.12411  |
| 117B ->125B | 0.10500  |
| 119B ->124B | -0.11027 |
| 120B ->123B | -0.21431 |

Excited State 10: 2.153-A 3.3673 eV 368.20 nm f=0.1940 <S\*\*2>=0.909

|             |          |
|-------------|----------|
| 119A ->125A | 0.10318  |
| 121A ->122A | 0.87146  |
| 104B ->121B | -0.10242 |
| 114B ->121B | 0.27272  |
| 116B ->121B | 0.28511  |

PyBTM (UB3LYP/6-31g(d,p)6D10F) (ground state in a vacuum)

129A is SOMO.

Excited State 1: 2.154-A 2.5550 eV 485.27 nm f=0.0191 <S\*\*2>=0.910

|             |          |
|-------------|----------|
| 129A ->131A | -0.19971 |
| 125B ->129B | 0.12069  |
| 127B ->129B | 0.36779  |
| 128B ->129B | 0.87229  |

Excited State 2: 2.147-A 2.6992 eV 459.34 nm f=0.0199 <S\*\*2>=0.902

|             |          |
|-------------|----------|
| 128A ->130A | -0.10488 |
| 129A ->131A | -0.15802 |
| 125B ->129B | 0.14564  |
| 127B ->129B | 0.84910  |
| 128B ->129B | -0.43169 |

Excited State 3: 2.175-A 2.7048 eV 458.39 nm f=0.0064 <S\*\*2>=0.933

|             |         |
|-------------|---------|
| 129A ->130A | 0.23427 |
| 124B ->129B | 0.44217 |
| 126B ->129B | 0.82173 |

Excited State 4: 2.097-A 2.8434 eV 436.04 nm f=0.0066 <S\*\*2>=0.849

|             |          |
|-------------|----------|
| 129A ->132A | -0.10178 |
| 125B ->129B | 0.95024  |

127B ->129B -0.22113

Excited State 5: 2.156-A 2.8648 eV 432.78 nm f=0.0066 <S\*\*2>=0.912

129A ->130A 0.25054

124B ->129B 0.76776

126B ->129B -0.53440

Excited State 6: 2.275-A 3.0604 eV 405.13 nm f=0.0003 <S\*\*2>=1.044

123A ->130A 0.10282

129A ->131A 0.16555

123B ->129B 0.92760

123B ->130B -0.20412

Excited State 7: 2.389-A 3.1813 eV 389.73 nm f=0.0075 <S\*\*2>=1.177

124A ->130A 0.19007

127A ->134A 0.10230

128A ->134A 0.13897

129A ->130A 0.32472

129A ->137A 0.20023

122B ->129B 0.77306

122B ->130B -0.10150

124B ->129B -0.20395

128B ->134B -0.14479

Excited State 8: 2.404-A 3.3825 eV 366.54 nm f=0.1196 <S\*\*2>=1.195

125A ->132A 0.13238

126A ->133A -0.14350

129A ->130A 0.75367

122B ->129B -0.32205

124B ->129B -0.36225

125B ->132B -0.10374

126B ->133B -0.10724

127B ->131B -0.13447

128B ->131B -0.10702

Excited State 9: 2.547-A 3.3885 eV 365.90 nm f=0.1520 <S\*\*2>=1.372

125A ->133A 0.17224

126A ->132A -0.17861

129A ->131A 0.76399

123B ->129B -0.23074



|             |          |
|-------------|----------|
| 124B ->131B | 0.15622  |
| 125B ->129B | 0.16055  |
| 125B ->133B | 0.14223  |
| 126B ->132B | 0.13351  |
| 127B ->129B | 0.24228  |
| 127B ->130B | -0.10682 |
| 128B ->129B | 0.14499  |

Excited State 10: 2.259-A 3.7203 eV 333.27 nm f=0.0095 <S\*\*2>=1.025

|             |         |
|-------------|---------|
| 129A ->132A | 0.94872 |
| 125B ->129B | 0.11248 |

PyBTM (UB3LYP/6-31g(d,p)6D10F) (lowest excited state in a vacuum)

129A is SOMO.

Excited State 1: 2.092-A 2.0384 eV 608.25 nm f=0.0027 <S\*\*2>=0.844

|             |         |
|-------------|---------|
| 128B ->129B | 0.98100 |
|-------------|---------|

Excited State 2: 2.129-A 2.4045 eV 515.64 nm f=0.0181 <S\*\*2>=0.883

|             |         |
|-------------|---------|
| 129A ->130A | 0.20317 |
| 124B ->129B | 0.25283 |
| 127B ->129B | 0.91691 |

Excited State 3: 2.129-A 2.4491 eV 506.24 nm f=0.0429 <S\*\*2>=0.883

|             |          |
|-------------|----------|
| 129A ->131A | -0.20086 |
| 125B ->129B | 0.17005  |
| 126B ->129B | 0.93911  |

Excited State 4: 2.088-A 2.6661 eV 465.04 nm f=0.0074 <S\*\*2>=0.840

|             |          |
|-------------|----------|
| 123B ->129B | 0.10515  |
| 125B ->129B | 0.95551  |
| 126B ->129B | -0.19907 |

Excited State 5: 2.108-A 2.6772 eV 463.11 nm f=0.0114 <S\*\*2>=0.861

|             |          |
|-------------|----------|
| 129A ->130A | 0.19258  |
| 124B ->129B | 0.90583  |
| 127B ->129B | -0.32258 |

Excited State 6: 2.172-A 2.8117 eV 440.96 nm f=0.0006 <S\*\*2>=0.929

123B ->129B 0.95570  
123B ->131B 0.15997  
125B ->129B -0.11804

Excited State 7: 2.374-A 3.1011 eV 399.80 nm f=0.0111 <S\*\*2>=1.159

124A ->130A -0.13302  
127A ->130A -0.10174  
128A ->133A 0.21951  
129A ->130A 0.33778  
129A ->137A -0.18650  
111B ->129B -0.10330  
120B ->129B 0.11182  
122B ->129B 0.75179  
124B ->129B -0.18946  
127B ->129B -0.13250  
128B ->133B 0.22163

Excited State 8: 2.579-A 3.2986 eV 375.87 nm f=0.1131 <S\*\*2>=1.413

124A ->132A 0.10041  
125A ->134A -0.15798  
126A ->130A 0.13794  
127A ->132A -0.15162  
129A ->131A 0.79703  
123B ->129B 0.10037  
124B ->130B -0.13644  
125B ->129B 0.13383  
125B ->134B -0.13747  
126B ->129B 0.23654  
126B ->131B 0.15169  
127B ->130B -0.16073  
127B ->132B 0.11701

Excited State 9: 2.669-A 3.3826 eV 366.53 nm f=0.1258 <S\*\*2>=1.531

125A ->131A -0.12542  
125A ->132A 0.16701  
126A ->131A 0.18287  
127A ->134A 0.17404  
128A ->131A -0.11283  
129A ->130A 0.69044

|             |          |
|-------------|----------|
| 129A ->137A | 0.10842  |
| 122B ->129B | -0.28366 |
| 124B ->129B | -0.24083 |
| 124B ->131B | -0.11040 |
| 124B ->134B | -0.11036 |
| 125B ->132B | -0.15280 |
| 126B ->130B | 0.23087  |
| 127B ->129B | -0.14697 |
| 127B ->134B | 0.12410  |

Excited State 10: 3.194-A 3.5611 eV 348.16 nm f=0.0015 <S\*\*2>=2.300

|             |          |
|-------------|----------|
| 125A ->133A | -0.14714 |
| 126A ->132A | -0.10037 |
| 128A ->132A | -0.23839 |
| 128A ->133A | 0.48710  |
| 122B ->129B | -0.46410 |
| 125B ->133B | 0.11558  |
| 128B ->132B | -0.17684 |
| 128B ->133B | 0.51469  |

PyBTM (UB3LYP/6-31g(d,p)6D10F) (ground state in dichloromethane)

129A is SOMO.

Excited State 1: 2.152-A 2.5462 eV 486.93 nm f=0.0349 <S\*\*2>=0.908

|             |          |
|-------------|----------|
| 129A ->131A | 0.19782  |
| 125B ->129B | -0.16979 |
| 126B ->129B | 0.23380  |
| 128B ->129B | 0.90971  |

Excited State 2: 2.156-A 2.6913 eV 460.69 nm f=0.0069 <S\*\*2>=0.912

|             |         |
|-------------|---------|
| 129A ->130A | 0.20183 |
| 124B ->129B | 0.42923 |
| 127B ->129B | 0.84194 |

Excited State 3: 2.142-A 2.7223 eV 455.44 nm f=0.0222 <S\*\*2>=0.897

|             |          |
|-------------|----------|
| 129A ->131A | 0.11656  |
| 125B ->129B | -0.22284 |
| 126B ->129B | 0.89403  |

|                  |          |           |           |          |              |  |
|------------------|----------|-----------|-----------|----------|--------------|--|
| 128B ->129B      | -0.30902 |           |           |          |              |  |
| Excited State 4: | 2.094-A  | 2.8077 eV | 441.59 nm | f=0.0101 | <S**2>=0.846 |  |
| 125B ->129B      | 0.92781  |           |           |          |              |  |
| 126B ->129B      | 0.29035  |           |           |          |              |  |
| 128B ->129B      | 0.12739  |           |           |          |              |  |
| Excited State 5: | 2.160-A  | 2.8359 eV | 437.19 nm | f=0.0115 | <S**2>=0.916 |  |
| 129A ->130A      | 0.24802  |           |           |          |              |  |
| 124B ->129B      | 0.78307  |           |           |          |              |  |
| 127B ->129B      | -0.50831 |           |           |          |              |  |
| Excited State 6: | 2.292-A  | 3.1639 eV | 391.87 nm | f=0.0004 | <S**2>=1.064 |  |
| 123A ->130A      | 0.10735  |           |           |          |              |  |
| 129A ->131A      | 0.19478  |           |           |          |              |  |
| 123B ->129B      | 0.91957  |           |           |          |              |  |
| 123B ->130B      | -0.21273 |           |           |          |              |  |
| Excited State 7: | 2.364-A  | 3.1746 eV | 390.55 nm | f=0.0218 | <S**2>=1.148 |  |
| 124A ->130A      | 0.19311  |           |           |          |              |  |
| 126A ->134A      | -0.12342 |           |           |          |              |  |
| 128A ->134A      | 0.10337  |           |           |          |              |  |
| 129A ->130A      | 0.44419  |           |           |          |              |  |
| 129A ->137A      | 0.17626  |           |           |          |              |  |
| 122B ->129B      | 0.71351  |           |           |          |              |  |
| 122B ->130B      | -0.11076 |           |           |          |              |  |
| 124B ->129B      | -0.24892 |           |           |          |              |  |
| 126B ->134B      | 0.11892  |           |           |          |              |  |
| 128B ->134B      | -0.10598 |           |           |          |              |  |
| Excited State 8: | 2.416-A  | 3.3538 eV | 369.68 nm | f=0.1422 | <S**2>=1.209 |  |
| 125A ->131A      | 0.11095  |           |           |          |              |  |
| 125A ->132A      | 0.10938  |           |           |          |              |  |
| 127A ->133A      | -0.13798 |           |           |          |              |  |
| 128A ->131A      | -0.12655 |           |           |          |              |  |
| 129A ->130A      | 0.71986  |           |           |          |              |  |
| 129A ->137A      | -0.11602 |           |           |          |              |  |
| 122B ->129B      | -0.43493 |           |           |          |              |  |
| 124B ->129B      | -0.30590 |           |           |          |              |  |
| 127B ->133B      | 0.11373  |           |           |          |              |  |

128B ->131B 0.13300

Excited State 9: 2.557-A 3.3796 eV 366.86 nm f=0.1867 <S\*\*2>=1.385

125A ->133A 0.15508  
127A ->132A -0.17169  
129A ->131A 0.76642  
123B ->129B -0.25765  
124B ->131B 0.15904  
125B ->129B 0.17044  
125B ->133B -0.13920  
126B ->129B -0.16042  
127B ->132B 0.13852  
128B ->129B -0.19084  
128B ->130B 0.10653

Excited State 10: 3.118-A 3.7390 eV 331.60 nm f=0.0115 <S\*\*2>=2.180

124A ->130A -0.16278  
125A ->131A 0.14291  
125A ->132A 0.23048  
125A ->134A -0.14338  
126A ->132A 0.22968  
127A ->133A -0.30903  
128A ->131A -0.17768  
128A ->134A -0.14927  
129A ->130A -0.26286  
122B ->129B 0.42454  
124B ->129B -0.10369  
124B ->130B 0.19076  
125B ->131B -0.14309  
125B ->132B -0.23739  
125B ->134B 0.12999  
126B ->131B 0.12566  
126B ->132B -0.18797  
127B ->133B 0.28661  
128B ->131B 0.19146  
128B ->134B 0.13515

PyBTM (UB3LYP/6-31g(d,p)6D10F) (lowest excited state in dichloromethane)

129A is SOMO.

|               |    |             |           |           |          |                                   |
|---------------|----|-------------|-----------|-----------|----------|-----------------------------------|
| Excited State | 1: | 2.104-A     | 2.1687 eV | 571.69 nm | f=0.0457 | $\langle S^{**2} \rangle = 0.856$ |
|               |    | 129A ->131A | -0.19083  |           |          |                                   |
|               |    | 128B ->129B | 0.96425   |           |          |                                   |
| Excited State | 2: | 2.133-A     | 2.4358 eV | 509.01 nm | f=0.0180 | $\langle S^{**2} \rangle = 0.887$ |
|               |    | 129A ->130A | 0.23285   |           |          |                                   |
|               |    | 124B ->129B | 0.31412   |           |          |                                   |
|               |    | 126B ->129B | 0.89020   |           |          |                                   |
| Excited State | 3: | 2.093-A     | 2.4603 eV | 503.95 nm | f=0.0138 | $\langle S^{**2} \rangle = 0.845$ |
|               |    | 127B ->129B | 0.98329   |           |          |                                   |
| Excited State | 4: | 2.103-A     | 2.6477 eV | 468.27 nm | f=0.0168 | $\langle S^{**2} \rangle = 0.855$ |
|               |    | 129A ->131A | -0.14622  |           |          |                                   |
|               |    | 125B ->129B | 0.96593   |           |          |                                   |
| Excited State | 5: | 2.106-A     | 2.6657 eV | 465.10 nm | f=0.0094 | $\langle S^{**2} \rangle = 0.859$ |
|               |    | 129A ->130A | 0.18945   |           |          |                                   |
|               |    | 124B ->129B | 0.87870   |           |          |                                   |
|               |    | 126B ->129B | -0.38509  |           |          |                                   |
| Excited State | 6: | 2.232-A     | 2.9978 eV | 413.58 nm | f=0.0014 | $\langle S^{**2} \rangle = 0.996$ |
|               |    | 129A ->131A | -0.19059  |           |          |                                   |
|               |    | 123B ->129B | 0.93340   |           |          |                                   |
|               |    | 123B ->130B | 0.20350   |           |          |                                   |
| Excited State | 7: | 2.247-A     | 3.0932 eV | 400.83 nm | f=0.0363 | $\langle S^{**2} \rangle = 1.012$ |
|               |    | 124A ->130A | 0.15093   |           |          |                                   |
|               |    | 126A ->130A | 0.11218   |           |          |                                   |
|               |    | 127A ->134A | 0.10967   |           |          |                                   |
|               |    | 129A ->130A | -0.49214  |           |          |                                   |
|               |    | 129A ->137A | 0.16580   |           |          |                                   |
|               |    | 120B ->129B | -0.10057  |           |          |                                   |
|               |    | 122B ->129B | 0.73164   |           |          |                                   |
|               |    | 124B ->129B | 0.17062   |           |          |                                   |
|               |    | 126B ->129B | 0.13509   |           |          |                                   |
|               |    | 127B ->134B | 0.10223   |           |          |                                   |

Excited State 8: 2.432-A 3.1939 eV 388.19 nm f=0.2134 <S\*\*2>=1.229

|             |          |
|-------------|----------|
| 126A ->132A | -0.10380 |
| 128A ->130A | -0.11921 |
| 129A ->131A | 0.82283  |
| 123B ->129B | 0.23172  |
| 124B ->131B | -0.12176 |
| 125B ->129B | 0.16706  |
| 126B ->131B | -0.11436 |
| 128B ->129B | 0.21945  |
| 128B ->130B | 0.14934  |

Excited State 9: 2.440-A 3.2202 eV 385.03 nm f=0.1545 <S\*\*2>=1.239

|             |          |
|-------------|----------|
| 126A ->133A | -0.10632 |
| 128A ->131A | -0.20391 |
| 129A ->130A | 0.69949  |
| 129A ->137A | 0.12656  |
| 122B ->129B | 0.45270  |
| 124B ->129B | -0.25815 |
| 126B ->129B | -0.13275 |
| 128B ->131B | 0.21911  |

Excited State 10: 3.122-A 3.6470 eV 339.96 nm f=0.0156 <S\*\*2>=2.187

|             |          |
|-------------|----------|
| 124A ->130A | -0.19029 |
| 124A ->133A | -0.11831 |
| 125A ->131A | 0.10405  |
| 125A ->132A | -0.12236 |
| 125A ->134A | 0.14461  |
| 126A ->133A | 0.20976  |
| 127A ->132A | -0.23067 |
| 128A ->131A | 0.35028  |
| 128A ->134A | -0.10416 |
| 129A ->130A | 0.29057  |
| 122B ->129B | 0.40586  |
| 124B ->130B | 0.19004  |
| 124B ->133B | 0.14721  |
| 125B ->131B | -0.10301 |
| 125B ->132B | 0.12992  |
| 125B ->134B | -0.13269 |
| 126B ->130B | 0.15404  |
| 126B ->133B | -0.17197 |

|             |          |
|-------------|----------|
| 127B ->132B | -0.20061 |
| 128B ->131B | -0.36298 |



### Fermi constant couplings by DFT calculation

bisPyTM (UB3LYP/6-31g(d,p)6D10F) (ground state in a vacuum)

|    | Atom   | a.u.     | MegaHertz | Gauss     | 10(-4) cm-1 |
|----|--------|----------|-----------|-----------|-------------|
| 1  | Cl(35) | 0.00075  | 0.33008   | 0.11778   | 0.11010     |
| 2  | Cl(35) | 0.00075  | 0.33010   | 0.11779   | 0.11011     |
| 3  | Cl(35) | 0.00082  | 0.35762   | 0.12761   | 0.11929     |
| 4  | Cl(35) | 0.00055  | 0.23979   | 0.08556   | 0.07999     |
| 5  | Cl(35) | 0.00055  | 0.23982   | 0.08557   | 0.08000     |
| 6  | Cl(35) | 0.00082  | 0.35764   | 0.12762   | 0.11930     |
| 7  | Cl(35) | 0.00207  | 0.90764   | 0.32387   | 0.30276     |
| 8  | N(14)  | 0.01018  | 3.29073   | 1.17422   | 1.09767     |
| 9  | C(13)  | -0.00548 | -6.15594  | -2.19659  | -2.05340    |
| 10 | H(1)   | 0.00084  | 3.75804   | 1.34096   | 1.25355     |
| 11 | C(13)  | 0.02731  | 30.69819  | 10.95388  | 10.23981    |
| 12 | C(13)  | 0.02862  | 32.17003  | 11.47907  | 10.73077    |
| 13 | C(13)  | -0.00548 | -6.15576  | -2.19653  | -2.05334    |
| 14 | H(1)   | 0.00084  | 3.75800   | 1.34095   | 1.25353     |
| 15 | C(13)  | -0.02910 | -32.71837 | -11.67473 | -10.91367   |
| 16 | C(13)  | -0.00592 | -6.64986  | -2.37284  | -2.21816    |
| 17 | H(1)   | 0.00095  | 4.24479   | 1.51465   | 1.41591     |
| 18 | C(13)  | 0.01030  | 11.57812  | 4.13136   | 3.86205     |
| 19 | C(13)  | 0.02746  | 30.87395  | 11.01659  | 10.29844    |
| 20 | C(13)  | 0.02746  | 30.87396  | 11.01660  | 10.29844    |
| 21 | C(13)  | 0.02862  | 32.17008  | 11.47908  | 10.73078    |
| 22 | C(13)  | -0.00592 | -6.64985  | -2.37283  | -2.21815    |
| 23 | H(1)   | 0.00095  | 4.24479   | 1.51465   | 1.41591     |
| 24 | C(13)  | -0.00520 | -5.84803  | -2.08672  | -1.95069    |
| 25 | H(1)   | 0.00089  | 3.95670   | 1.41185   | 1.31981     |
| 26 | C(13)  | -0.02952 | -33.19053 | -11.84321 | -11.07117   |
| 27 | C(13)  | -0.02910 | -32.71857 | -11.67480 | -10.91374   |
| 28 | C(13)  | 0.02731  | 30.69809  | 10.95384  | 10.23978    |
| 29 | C(13)  | -0.00520 | -5.84786  | -2.08666  | -1.95064    |
| 30 | H(1)   | 0.00089  | 3.95667   | 1.41184   | 1.31980     |
| 31 | C(13)  | 0.09331  | 104.90279 | 37.43192  | 34.99180    |
| 32 | N(14)  | 0.01018  | 3.29081   | 1.17424   | 1.09770     |

### Spin density by DFT calculation

bisPyTM (UB3LYP/6-31g(d,p)6D10F) (ground state in a vacuum)

|    |    |           |
|----|----|-----------|
| 1  | Cl | 0.004672  |
| 2  | Cl | 0.004672  |
| 3  | Cl | 0.003887  |
| 4  | Cl | 0.003811  |
| 5  | Cl | 0.003811  |
| 6  | Cl | 0.003887  |
| 7  | Cl | 0.007707  |
| 8  | N  | 0.069617  |
| 9  | C  | -0.041933 |
| 10 | H  | 0.002189  |
| 11 | C  | 0.094733  |
| 12 | C  | 0.092385  |
| 13 | C  | -0.041932 |
| 14 | H  | 0.002189  |
| 15 | C  | -0.118650 |
| 16 | C  | -0.045783 |
| 17 | H  | 0.002301  |
| 18 | C  | 0.081260  |
| 19 | C  | 0.094683  |
| 20 | C  | 0.094681  |
| 21 | C  | 0.092386  |
| 22 | C  | -0.045783 |
| 23 | H  | 0.002301  |
| 24 | C  | -0.041541 |
| 25 | H  | 0.002307  |
| 26 | C  | -0.121159 |
| 27 | C  | -0.118652 |
| 28 | C  | 0.094732  |
| 29 | C  | -0.041540 |
| 30 | H  | 0.002307  |
| 31 | C  | 0.786832  |
| 32 | N  | 0.069619  |

Sum of Mulliken atomic densities = 1.00000
